# Supplementary material for: Haemoproteus syrnii and other haemosporidians infecting owls from North America
Source: Research Square preprint supplement (doi:10.21203/rs.3.rs-7235426/v1), 2025-08-06
Supplement: Supplementary file 1 [file 4b6d81b97d4ddd5f19c99b32.xlsx]

## Sheet: A_Sample information
Table S1A. Information of owl species included in this study.
No.	Owl English name	Scientific Name	AOU	ID	Age	Sex	Condition	Where found:	Date Sampled	Sample Type	Positive by PCR	Haemosporida Genus (Lineage)	GeneBank (cytb/mt)
1	American Barn Owl	Tyto furcata	BANO	20NW00017	Juvenile	F	Good body condition; Electrocution	Beaver Township, Crawford Co, PA	2020-08-13	Liver in ETOH	Negative
2	Barred Owl	Strix varia	BDOW	19-535	1 yr	M	Emaciated; old eye & brain injury	Dover, DE	2019-05-08	Liver in ETOH/Heart blood smear	Positive	Haemoproteus (STVAR01)	PV948498
3	Barred Owl	Strix varia	BDOW	19-1127	Adult	F	Open wing fracture; open leg fracture; euthanized	Suddlersville, MD	2019-06-10	Liver in ETOH	Positive	Haemoproteus (STVAR01)	PV948497
4	Barred Owl	Strix varia	BDOW	19-566	Adult	U	Dislocated elbow, ulna fracture; good body condition, euthanized	Preston, MD	2019-07-29	Liver in ETOH	Negative
5	Barred Owl	Strix varia	BDOW	2015-00693	Adult	M	Good; blood in mutes; education ambassador	Mercer County, NJ	2019-11-30	Blood smear/blood-filter paper	Negative
6	Barred Owl	Strix varia	BDOW	20-438	Adult	M	emaciated; hit by vehicle; fractured ulna; euthanized	Coatesville, PA	2021-04-09	Liver in ETOH	Negative
7	Barred Owl	Strix varia	BDOW	21-39	Adult	F	thin; old wing fracture; euthanized	Townsend, DE	2021-04-09	Liver in ETOH	Negative
8	Barred Owl	Strix varia	BDOW	20-385	Adult	F	Thin body condition; hit by car; wing fracture	Newark, DE	2021-04-16	Liver in ETOH	Positive	Haenoproteus (STVAR06)	PV948495/PV948486
9	Barred Owl	Strix varia	BDOW	20-408	Adult	M	Thin; hit by vehicle	West Grove, PA	2021-04-16	Liver in ETOH	Positive	Haenoproteus (STVAR06)	PV948496
10	Eastern Screech-Owl	Megascops asio	EASO	19-937	~3wks	M	cranial edema	Coatesville, PA	2019-05-28	Liver in ETOH	Negative
11	Eastern Screech-Owl	Megascops asio	EASO	19-1230	~3 weeks	M	fell from nest	Nottingham, PA	2019-06-09	Blood-Filter Paper	Negative
12	Eastern Screech-Owl	Megascops asio	EASO	19-979	Adult	U	eye trauma and femur fracture; thin; euthanized	Middle Township, NJ	2019-07-29	Liver in ETOH	Positive	Haemoproteus (MEGASI01)	PV948513/PV948491
13	Eastern Screech-Owl	Megascops asio	EASO	19-2429	Juvenile	U	Good body condition; euthanized	Mullica Hill, NJ	2019-08-13	Liver in ETOH	Positive	Haemoproteus (MEGASI01)	PV948514
14	Eastern Screech-Owl	Megascops asio	EASO	2020-00050	Adult	U	hit by car; good body condition	Hamilton Township, Mercer Co., NJ	2020-02-15	Blood-Filter Paper/blood smear	Positive	Plasmodium (cytb: WW3 and , mt: PADOM11)	PV948515/PP317151
15	Great horned Owl	Bubo virginianus	GHOW	19-898	Adult	F	emaciated	Elverson, PA	2019-05-27	Liver in ETOH	Positive	Haemoproteus (STVAR01)	PV948499/PV948475
16	Great horned Owl	Bubo virginianus	GHOW	19-647	Adult	F	trauma; emaciated	Garnet Valley, PA	2019-05-28	Liver in ETOH	Positive	Haemoproteus (STVAR01)	PV948500
17	Great horned Owl	Bubo virginianus	GHOW	19-1220	Adult	M	shoulder injury; reasonable body condition; euth.	Avondale, PA	2019-06-10	Liver in ETOH	Positive	Haemoproteus (STVAR01)	PV948501
18	Great horned Owl	Bubo virginianus	GHOW	19-1449	Adult	F	emaciated; foot abscess; nematodes, eye trauma	Rock Hall, MD	2019-06-19	Liver in ETOH	Positive	Haemoproteus (STVAR01)	PV948502/PV948478
19	Great horned Owl	Bubo virginianus	GHOW	2019-01677	Adult	F	emaciated; hepatomegally & splenomegally	Trenton, Mercer Co., NJ	2019-07-13	Blood-Filter Paper	Positive	Haemoproteus (STVAR01)	PV948503/PV948479
20	Great horned Owl	Bubo virginianus	GHOW	19-2019	Adult	M	punctured eye; emaciated; euthanized	Preston, MD	2019-07-18	Liver in ETOH	Positive	Haemoproteus (STVAR01)	PV948504/PV948480
21	Great horned Owl	Bubo virginianus	GHOW	19-2096	Juvenile	U	leg wound; emaciated; euthanized	Downingtown, PA	2019-07-22	Liver in ETOH	Positive	Haemoproteus (STVAR01)/Leucocytozoon (BUVIR02, BUVIR06, and STOCC16)	PV948505/PV948481/PV948487/PV948488/PV948489
22	Great horned Owl	Bubo virginianus	GHOW	2016-00281	Adult	F	Good; recent aggressive behavior; education ambassador	Mercer County, NJ	2019-11-30	Blood smear/blood-filter paper	Positive	Haemoproteus (STVAR01)	PV948506/PV948482
23	Great horned Owl	Bubo virginianus	GHOW	20-055	Adult	M	Emaciated; died in care; head trauma	Oxford, PA	2020-01-19	Liver in ETOH	Positive	Haemoproteus (STVAR01)/Leucocytozoon (BUVIR10)	PV948507/PV948483/PV948490
24	Great horned Owl	Bubo virginianus	GHOW	2019-03102	Adult	F	caught tangled in soccer net; good body condition	East Windsor, NJ	2019-12-21	Blood smear/blood-Filter Paper	Negative
25	Great horned Owl	Bubo virginianus	GHOW	20-899	>2yr	F	Emaciated; cause of death unknown	Newark, DE	2020-05-22	Liver in ETOH	Positive	Haemoproteus (STVAR01)	PV948508/PV948476
26	Great-horned Owl	Bubo virginianus	GHOW	20-289	Adult	M	emaciated; head trauma and contaminated w/cooking oil	Bear, DE	2021-04-16	Liver in ETOH	Positive	Haemoproteus (STVAR01)	PV948509/PV948477
27	Great-horned Owl	Bubo virginianus	GHOW	20-402	Adult	F	Very thin body condition; hit by vehicle	Berlin, MD	2021-04-16	Liver in ETOH	Negative
28	Great-horned Owl	Bubo virginianus	GHOW	21-118	Adult	M	Thin body condition; hit by vehicle	Chesapeake City, MD	2021-04-16	Liver in ETOH	Positive	Haemoproteus (STVAR01)	PV948510
29	Great-horned Owl	Bubo virginianus	GHOW	21-449	Adult	M	Emaciated; old eye injury	Woodbine, NJ	2021-04-16	Liver in ETOH	Negative
30	Great Horned Owl	Bubo virginianus	GHOW	RM-0001	AHY	U		PIA, Peoria, IL	2020-04-08	Blood-Filter Paper	Positive	Haemoproteus (STVAR01)	PV948511/PV948484
31	Great Horned Owl	Bubo virginianus	GHOW	RM-0005	AHY	U		PIA, Peoria, IL	2020-05-07	Blood-Filter Paper	Positive	Haemoproteus (STVAR01)	PV948512/PV948485
32	Northern Saw-Whet Owl	Aegolius acadicus	NSWO	RM-0202	ASY	F		Hawk Ridge, Saint Louis county, MN	2020-10-04	Blood-Filter Paper	Negative
33	Snowy Owl	Bubo scandiacus	SNOW	N1911749	Adult	M	dead, trauma	Gloucester, MA	2019-05-22	Liver in ETOH	Negative
34	Snowy Owl	Bubo scandiacus	SNOW	N1911751	Adult	M	dead, hit by plane	Logan Airport, Boston, MA	2019-05-23	Liver in ETOH	Negative
35	Snowy Owl	Bubo scandiacus	SNOW	N1911752	Adult	M	dead, hit by plane	Parker River WR, Newbury, MA	2019-05-24	Liver in ETOH	Negative
36	Snowy Owl	Bubo scandiacus	SNOW	N1911753	Adult	M	dead, aspergillosis	WellFleet, MA	2019-05-25	Liver in ETOH	Negative
37	Snowy Owl	Bubo scandiacus	SNOW	N1911755	Adult	M	dead, hit by plane	Logan Airport, Boston, MA	2019-05-26	Liver in ETOH	Negative
38	Snowy Owl	Bubo scandiacus	SNOW	N1911758	Adult	M	dead, hit by plane	Logan Airport, Boston, MA	2019-05-27	Liver in ETOH	Negative
39	Snowy Owl	Bubo scandiacus	SNOW	N1911767	Adult	F	dead, hit by plane	Logan Airport, Boston, MA	2019-05-28	Liver in ETOH	Negative
40	Snowy Owl	Bubo scandiacus	SNOW	N1911768	Adult	F	dead, aspergillosis	Logan; Governor Island, MA	2019-05-29	Liver in ETOH	Negative
41	Snowy Owl	Bubo scandiacus	SNOW	N1911769	Adult	F	dead, hit by plane	Logan Airport, Boston, MA	2019-05-30	Liver in ETOH	Negative
42	Snowy Owl	Bubo scandiacus	SNOW	N2029056	Juvenile	M	emaciated; no evidence of disease;	Union City, Erie County, PA	2020-12-15	Liver in ETOH	Negative
43	Snowy Owl	Bubo scandiacus	SNOW	N2030262	Juvenile	M	very good body condition; plane collision	Logan Airport, Boston, MA	2020-12-15	Liver in ETOH	Negative
44	Snowy Owl	Bubo scandiacus	SNOW	N2030263	Juvenile	F	very good body condition; plane collision	Logan Airport, Boston, MA	2020-12-15	Liver in ETOH	Negative
45	Snowy Owl	Bubo scandiacus	SNOW	N2030264	Juvenile	F	very good body condition; plane collision	Logan Airport, Boston, MA	2020-12-15	Liver in ETOH	Negative
46	Snowy Owl	Bubo scandiacus	SNOW	N2030560	Immature	F	thin; trauma	Meddybemps, ME	2020-12-16	Liver in ETOH	Negative
47	Snowy Owl	Bubo scandiacus	SNOW	N2030561	Juvenile	M	emaciated; possible head trauma	Frenchville, ME	2020-12-16	Liver in ETOH	Negative
48	Snowy Owl	Bubo scandiacus	SNOW	N2030564	Immature	M	found dead; emaciated	Phippsburg, ME	2020-12-16	Liver in ETOH	Negative
49	Snowy Owl	Bubo scandiacus	SNOW	N2030565	Juvenile	M	emaciated; traumatic injuries	Casco, ME	2020-12-16	Liver in ETOH	Negative
50	Snowy Owl	Bubo scandiacus	SNOW	N2106657	Juvenile	M	emaciated; head trauma	Phippsburg, ME	2021-03-17	Liver in ETOH	Negative
51	Snowy Owl	Bubo scandiacus	SNOW	N2106661	Immature	F	Obese body condition; electrocuted	Biddeford, ME	2021-03-17	Liver in ETOH	Negative
52	Snowy Owl	Bubo scandiacus	SNOW	N2110271	Juvenile	F	very good body condition; plane collision	Newark Airport, NJ	2021-04-21	Liver in ETOH	Negative
53	Snowy Owl	Bubo scandiacus	SNOW	N2116484	Immature	M	Emaciated; cause of death unknown	Limestone, ME	2021-07-01	Liver in ETOH	Negative
54	Snowy Owl	Bubo scandiacus	SNOW	N2116484	Immature	M	Emaciated; cause of death unknown	Maine	2021-07-01	Liver in ETOH	Negative

## Sheet: B_Owl and parasite species
Table S1B. Haemosporidian lineages found on owls. Data from this study, GenBank, and MalAvi database (July 2025).
Haemosporidian lineages per owl species													Number of each haemosporidian genus per owl species and their geographic distribution.
No.	Lineage	Parasite Genus	Family	Owl Especie	Host_Environment	Continent	Country Region	State	Notes						Haemosporida genera
1	BAEBIC02	Plasmodium	Strigidae	Aegolius acadicus	Wild	North America	United States	New York					#	Owl Especie	P	H	L	Total	Owl Distribution
2	BT7	Plasmodium	Strigidae	Aegolius acadicus	Wild	North America	United States	New York					1	Aegolius acadicus	8	1	8	17	North America
3	CATUST05	Plasmodium	Strigidae	Aegolius acadicus	Wild	North America	United States	New York					2	Aegolius funereus	2	1	4	7	North of North America and Europe
4	GEOTRI09	Plasmodium	Strigidae	Aegolius acadicus	Wild	North America	United States	Pennsylvania					3	Asio clamator	2	1	0	3	Mexico and South America
5	PADOM11	Plasmodium	Strigidae	Aegolius acadicus	Wild	North America	United States	Vermont					4	Asio flammeus	0	1	1	2	Europe, Asia, North and South America, the Caribbean, Hawaii, and the Galápagos Islands
5	PADOM11	Plasmodium	Strigidae	Aegolius acadicus	Wild	North America	United States	New York					5	Asio otus	1	8	9	18	Northern Hemisphere
6	RWB01	Plasmodium	Strigidae	Aegolius acadicus	Wild	North America	United States	New York					6	Asio stygius	1	0	0	1	from Mexico through Argentina and the Caribbean
7	SEIAUR01	Plasmodium	Strigidae	Aegolius acadicus	Wild	North America	United States	New York					7	Athene brama	2	2	0	4	Asia
8	SW5	Plasmodium	Strigidae	Aegolius acadicus	Wild	North America	United States	New York					8	Athene cunicularia	1	0	0	1	America
9	AEAC01	Leucocytozoon	Strigidae	Aegolius acadicus	Wild	North America	United States	New York					9	Athene noctua	3	5	2	10	Europe, the Palearctic east to Korea, and North Africa
10	AEFUN02	Leucocytozoon	Strigidae	Aegolius acadicus	Wild	North America	United States	New York					10	Bubo bubo	3	7	2	12	Eurasia
11	AEGACA01	Leucocytozoon	Strigidae	Aegolius acadicus	Wild	North America	United States	Pennsylvania					11	Bubo capensis	0	0	2	2	Africa
12	BNOW04	Leucocytozoon	Strigidae	Aegolius acadicus	Wild	North America	United States	New York					12	Bubo scandiacus	4	1	1	6	Arctic regions of North America, Europe, and Asia
13	BUVIR04	Leucocytozoon	Strigidae	Aegolius acadicus	Wild	North America	United States	New York					13	Bubo sumatranus	1	0	1	2	Asia
14	STOCC03	Leucocytozoon	Strigidae	Aegolius acadicus	Wild	North America	United States	New York					14	Bubo virginianus	3	2	9	14	America
15	STOCC06	Leucocytozoon	Strigidae	Aegolius acadicus	Wild	North America	United States	New York					15	Glaucidium brodiei	0	2	0	2	Asia
16	STOCC13	Leucocytozoon	Strigidae	Aegolius acadicus	Wild	North America	United States	New York					16	Glaucidium cuculoides	9	3	0	12	Asia
17	STVAR08?	Haemoproteus	Strigidae	Aegolius acadicus	Wild	North America	United States	New York					17	Glaucidium sjostedti	0	1	1	2	Africa
1	AEFUN03	Haemoproteus	Strigidae	Aegolius funereus	Wild	Europe	Czech Republic						18	Ketupa ketupa	1	0	0	1	Asia
2	AEFUN02	Leucocytozoon	Strigidae	Aegolius funereus	Wild	Europe	Lithuania						19	Megascops asio	2	1	0	3	North America
2	AEFUN02	Leucocytozoon	Strigidae	Aegolius funereus	Wild	Europe	Czech Republic						20	Megascops choliba	1	2	0	3	Central and South America
2	AEFUN02	Leucocytozoon	Strigidae	Aegolius funereus	Wild	Europe	Czech Republic						21	Megascops ingens	0	1	0	1	South America
3	ASOT06	Leucocytozoon	Strigidae	Aegolius funereus	Wild	Europe	Lithuania						22	Megascops kennicottii	1	0	2	3	North America
4	BT2	Leucocytozoon	Strigidae	Aegolius funereus	Wild	Europe	Czech Republic						23	Ninox philippensis	1	5	1	7	Philippines
4	BT2	Leucocytozoon	Strigidae	Aegolius funereus	Wild	Europe	Czech Republic						24	Ninox scutulata	3	5	2	10	South Asia
5	STOCC06	Leucocytozoon	Strigidae	Aegolius funereus	Wild	Europe	Lithuania						25	Otus bakkamoena	1	0	0	1	Asia
5	STOCC06	Leucocytozoon	Strigidae	Aegolius funereus	Wild	Europe	Czech Republic						26	Otus lempiji	0	2	3	5	Asia
5	STOCC06	Leucocytozoon	Strigidae	Aegolius funereus	Wild	Europe	Czech Republic						27	Otus lettia	1	4	0	5	Asia
6	AEFUN01	Plasmodium	Strigidae	Aegolius funereus	Wild	Europe	Lithuania						28	Otus megalotis	0	1	0	1	Philippines
7	TURDUS1	Plasmodium	Strigidae	Aegolius funereus	Wild	Europe	Czech Republic						29	Otus scops	4	5	13	22	Europe, Africa, and Asia
1	ASIFLA01	Leucocytozoon	Strigidae	Asio flammeus	Captivity	Asia	Japan						30	Otus sunia	0	1	2	3	Asia
1	ASIFLA01	Leucocytozoon	Strigidae	Asio flammeus	Wild	Asia	China						31	Phodilus badius	0	1	0	1	Asia
1	ASIFLA01	Leucocytozoon	Strigidae	Asio flammeus	Wild	Asia	Thailand						32	Pulsatrix koeniswaldiana	1	0	0	1	South America
2	ASIFLA02	Haemoproteus	Strigidae	Asio flammeus	Wild	Asia	China						33	Strix aluco	1	5	2	8	Europe to western Siberia
1	ASIOTU01	Haemoproteus	Strigidae	Asio otus	Wild	Asia	China						34	Strix nebulosa	2	4	1	7	North America
2	ASIOTU04	Haemoproteus	Strigidae	Asio otus	Wild	Europe	Austria						35	Strix occidentalis	0	3	17	20	North America
2	ASIOTU04	Haemoproteus	Strigidae	Asio otus	Wild	Europe	Lithuania						36	Strix seloputo	0	1	0	1	Asia
3	ASIOTU05	Haemoproteus	Strigidae	Asio otus	Wild	Europe	Austria						37	Strix uralensis	1	8	0	9	Palearctic region
4	ASOT03	Haemoproteus	Strigidae	Asio otus	Wild	North America	United States	California					38	Strix varia	1	7	2	10	North America
4	ASOT03	Haemoproteus	Strigidae	Asio otus	Wild	Europe	Lithuania						39	Strix woodfordii	0	2	1	3	Africa
5	ASOT04	Haemoproteus	Strigidae	Asio otus	Wild	Europe	Lithuania						40	Surnia ulula	0	0	1	1	North America
6	BUBIBI01	Haemoproteus	Strigidae	Asio otus	Wild	Asia	China						41	Tyto alba	2	8	4	14	Europe, Africa, Asia
6	BUBIBI01	Haemoproteus	Strigidae	Asio otus	Wild	Asia	China						42	Tyto furcata	2	0	0	2	America
7	CIRCUM01	Haemoproteus	Strigidae	Asio otus	Wild	Asia	Russia							Total	65	101	91	257
7	CIRCUM01	Haemoproteus	Strigidae	Asio otus	Wild	Asia	China
7	CIRCUM01	Haemoproteus	Strigidae	Asio otus	Wild	Europe	Austria						Haemosporidian lineages per parasite frequency and the number of time that have been reported in databases.
7	CIRCUM01	Haemoproteus	Strigidae	Asio otus	Wild	Europe	Austria						#	Lineage	Parasite Genus	Freq
7	CIRCUM01	Haemoproteus	Strigidae	Asio otus	Wild	Europe	Austria						1	AEFUN03	Haemoproteus	1
7	CIRCUM01	Haemoproteus	Strigidae	Asio otus	Wild	Europe	Austria						2	ARW1	Haemoproteus	1
7	CIRCUM01	Haemoproteus	Strigidae	Asio otus	Wild	Europe	Austria						3	ASCLA01	Haemoproteus	2
8	CIRCUM06	Haemoproteus	Strigidae	Asio otus		Europe	Austria						4	ASIFLA02	Haemoproteus	1
9	ASIOTU02	Leucocytozoon	Strigidae	Asio otus	Wild	Asia	China						5	ASIOTU01	Haemoproteus	1
10	ASIOTU03	Leucocytozoon	Strigidae	Asio otus	Wild	Asia	China						6	ASIOTU04	Haemoproteus	2
11	ASOT06	Leucocytozoon	Strigidae	Asio otus	Wild	Europe	Lithuania						7	ASIOTU05	Haemoproteus	1
11	ASOT06	Leucocytozoon	Strigidae	Asio otus	Wild	Asia	China						8	ASOT03	Haemoproteus	2
12	ASOT1	Leucocytozoon	Strigidae	Asio otus	Wild	Europe	Germany						9	ASOT04	Haemoproteus	1
12	ASOT1	Leucocytozoon	Strigidae	Asio otus	Wild	Europe	Lithuania						10	ATHBRA01	Haemoproteus	1
12	ASOT2	Leucocytozoon	Strigidae	Asio otus	Wild	Europe	Germany						11	ATNO2	Haemoproteus	1
13	ASOT3	Leucocytozoon	Strigidae	Asio otus	Wild	Europe	Lithuania						12	BNOW01	Haemoproteus	1
14	BUVIR03	Leucocytozoon	Strigidae	Asio otus	Wild	North America	United States	California					13	BNOW02	Haemoproteus	1
15	CHRKLA02	Leucocytozoon	Strigidae	Asio otus	Wild	Asia	Turkey	Kayseri					14	BNOW03	Haemoproteus	1
16	CIAE02	Leucocytozoon	Strigidae	Asio otus	Wild	Asia	Turkey	Kayseri					15	BUBBUB01	Haemoproteus	1
17	STOCC06	Leucocytozoon	Strigidae	Asio otus	Wild	Asia	China						16	BUBBUB02	Haemoproteus	3
18	ASOT05	Plasmodium	Strigidae	Asio otus	Wild	Europe	Lithuania						17	BUBIBI01	Haemoproteus	3
1	ASSTY01	Plasmodium	Strigidae	Asio stygius	Wild	South America	Brazil						18	BUVIR08	Haemoproteus	1
1	ATHBRA01	Haemoproteus	Strigidae	Athene brama	Captivity	Asia	Thailand						19	CIRCUM01	Haemoproteus	8
2	GLACUC01	Haemoproteus	Strigidae	Athene brama	Wild	Asia	Myanmar						20	CIRCUM06	Haemoproteus	1
3	ACCBAD01	Plasmodium	Strigidae	Athene brama	Captivity	Asia	Thailand						21	CULKIB01	Haemoproteus	19
4	GLACUC02	Plasmodium	Strigidae	Athene brama	Wild	Asia	Myanmar						22	FALAMU01	Haemoproteus	1
1	DENFUL02	Plasmodium	Strigidae	Athene cunicularia	Wild	South America	Brazil						23	FALAMU02	Haemoproteus	1
1	ATNO2	Haemoproteus	Strigidae	Athene noctua	Wild	Africa	Morocco						24	GLACUC01	Haemoproteus	2
2	BUBBUB02	Haemoproteus	Strigidae	Athene noctua	Wild	Asia	China						25	GLACUC03	Haemoproteus	1
3	BUBIBI01	Haemoproteus	Strigidae	Athene noctua	Wild	Asia	China						26	GLACUC04	Haemoproteus	1
4	CIRCUM01	Haemoproteus	Strigidae	Athene noctua	Wild	Asia	China						27	GLBRO01	Haemoproteus	1
5	FALAMU01	Haemoproteus	Strigidae	Athene noctua	Wild	Asia	China						28	GLBRO02	Haemoproteus	1
6	ASOT06	Leucocytozoon	Strigidae	Athene noctua	Wild	Asia	China						29	GLSJO01	Haemoproteus	2
7	ATNO1	Leucocytozoon	Strigidae	Athene noctua	Wild	Africa	Morocco						30	LK03	Haemoproteus	2
7	ATNO1	Leucocytozoon	Strigidae	Athene noctua	Wild	Europe	Portugal						31	MEGASI01	Haemoproteus	1
8	GRW11	Plasmodium	Strigidae	Athene noctua	Captivity	Europe	France						32	NINOX01	Haemoproteus	1
9	LINN1	Plasmodium	Strigidae	Athene noctua	Wild	Europe	Italy						33	NINOX02	Haemoproteus	1
10	SGS1	Plasmodium	Strigidae	Athene noctua	Wild	Europe	Portugal						34	NINOX03	Haemoproteus	1
10	SGS1	Plasmodium	Strigidae	Athene noctua	Wild	Europe	Portugal						35	NINOX06	Haemoproteus	1
10	SGS1	Plasmodium	Strigidae	Athene noctua	Wild	Asia	China						36	NINOX07	Haemoproteus	3
1	BUBBUB01	Haemoproteus	Strigidae	Bubo bubo	Wild	Asia	China						37	NIPHI01	Haemoproteus	1
2	BUBBUB02	Haemoproteus	Strigidae	Bubo bubo	Wild	Asia	China						38	NIPHI02	Haemoproteus	1
3	BUBIBI01	Haemoproteus	Strigidae	Bubo bubo	Wild	Asia	China						39	OTSCO05	Haemoproteus	1
4	CULKIB01	Haemoproteus	Strigidae	Bubo bubo	Captivity	Europe	France						40	OTUING01	Haemoproteus	1
5	OTUSCO01	Haemoproteus	Strigidae	Bubo bubo	Wild	Asia	China						41	OTULEM01	Haemoproteus	1
6	STAL2	Haemoproteus	Strigidae	Bubo bubo	Captivity	Europe	France						42	OTULEM02	Haemoproteus	1
7	STRURA03	Haemoproteus	Strigidae	Bubo bubo	Captivity	Europe	France						43	OTULET01	Haemoproteus	1
7	STRURA03	Haemoproteus	Strigidae	Bubo bubo	Wild	Europe	Austria						44	OTULET02	Haemoproteus	1
7	STRURA03	Haemoproteus	Strigidae	Bubo bubo	Wild	Europe	Austria						45	OTUMEG01	Haemoproteus	1
7	STRURA03	Haemoproteus	Strigidae	Bubo bubo	Wild	Europe	Austria						46	OTUSCO01	Haemoproteus	3
7	STRURA03	Haemoproteus	Strigidae	Bubo bubo	Wild	Europe	Austria						47	OTUSCO02	Haemoproteus	2
8	BUBO01	Leucocytozoon	Strigidae	Bubo bubo	Wild	Europe	Spain						48	OTUSUN01	Haemoproteus	1
9	CIAE02	Leucocytozoon	Strigidae	Bubo bubo	Wild	Asia	China						49	PHOBAD01	Haemoproteus	1
10	ALARV04	Plasmodium	Strigidae	Bubo bubo	Wild	Asia	China						50	PLAMIN01	Haemoproteus	2
11	BUBBUB03	Plasmodium	Strigidae	Bubo bubo	Wild	Asia	China						51	PSDIS01	Haemoproteus	1
12	TSUB01	Plasmodium	Strigidae	Bubo bubo	Wild	Asia	China						52	STAL2	Haemoproteus	34
1	BUBCAP01	Leucocytozoon	Strigidae	Bubo capensis	Captivity	Africa	South Africa	Gauteng					53	STAL4	Haemoproteus	1
2	CIAE02	Leucocytozoon	Strigidae	Bubo capensis	Captivity	Africa	South Africa	Gauteng					54	STOCC01	Haemoproteus	3
1	STRURA03	Haemoproteus	Strigidae	Bubo scandiacus	Captivity	Europe	France						55	STOCC02	Haemoproteus	3
2	BUBSCA01	Plasmodium	Strigidae	Bubo scandiacus	Wild	North America	United States						56	STRURA01	Haemoproteus	1
3	GRW06	Plasmodium	Strigidae	Bubo scandiacus	Captivity	Europe	France						57	STRURA02	Haemoproteus	1
4	GRW11	Plasmodium	Strigidae	Bubo scandiacus	Captivity	Europe	France						58	STRURA03	Haemoproteus	8
5	SGS1	Plasmodium	Strigidae	Bubo scandiacus	Captivity	Europe	France						59	STSEL1	Haemoproteus	1
6	PHARUB01	Leucocytozoon	Strigidae	Bubo scandiacus	Wild	North America	United States						60	STVAR01	Haemoproteus	31
1	ACCBAD01	Plasmodium	Strigidae	Bubo sumatranus	Captivity	Asia	Thailand						61	STVAR02	Haemoproteus	1
2	BUBSUM01	Leucocytozoon	Strigidae	Bubo sumatranus	Wild	Asia	Thailand						62	STVAR03	Haemoproteus	1
1	BUVIR08	Haemoproteus	Strigidae	Bubo virginianus	Wild	North America	United States						63	STVAR06	Haemoproteus	5
2	STVAR01	Haemoproteus	Strigidae	Bubo virginianus	Wild	North America	United States	Florida					64	STVAR07	Haemoproteus	1
2	STVAR01	Haemoproteus	Strigidae	Bubo virginianus	Wild	North America	United States	California					65	STVAR08	Haemoproteus	1
2	STVAR01	Haemoproteus	Strigidae	Bubo virginianus	Wild	North America	United States	Pennsylvania	This study				66	STVAR09?	Haemoproteus	1
2	STVAR01	Haemoproteus	Strigidae	Bubo virginianus	Wild	North America	United States	Delaware	This study				67	STRURA02	Haemoproteus
2	STVAR01	Haemoproteus	Strigidae	Bubo virginianus	Wild	North America	United States	New Jersey	This study				68	TYTAL3	Haemoproteus	1
2	STVAR01	Haemoproteus	Strigidae	Bubo virginianus	Wild	North America	United States	Illinois	This study				69	TYTAL4	Haemoproteus	3
2	STVAR01	Haemoproteus	Strigidae	Bubo virginianus	Wild	North America	United States	Maryland	This study				70	TYTAL5	Haemoproteus	1
3	BNOW04	Leucocytozoon	Strigidae	Bubo virginianus	Wild	North America	United States	California					71	TYTAL6	Haemoproteus	5
4	BUVIR01	Leucocytozoon	Strigidae	Bubo virginianus	Wild	North America	United States	California					72	TYTAL7	Haemoproteus	1
5	BUVIR02	Leucocytozoon	Strigidae	Bubo virginianus	Wild	North America	United States	California					1	AEAC01	Leucocytozoon	1
5	BUVIR02	Leucocytozoon	Strigidae	Bubo virginianus	Wild	North America	United States	New York					2	AEFUN02	Leucocytozoon	4
5	BUVIR02	Leucocytozoon	Strigidae	Bubo virginianus	Wild	North America	United States	Pennsylvania	This study				3	AEGACA01	Leucocytozoon	1
6	BUVIR03	Leucocytozoon	Strigidae	Bubo virginianus	Wild	North America	United States	California					4	ASIFLA01	Leucocytozoon	3
7	BUVIR04	Leucocytozoon	Strigidae	Bubo virginianus	Wild	North America	United States	California					5	ASIOTU02	Leucocytozoon	1
8	BUVIR05	Leucocytozoon	Strigidae	Bubo virginianus	Wild	North America	United States	California					6	ASIOTU03	Leucocytozoon	1
9	BUVIR06	Leucocytozoon	Strigidae	Bubo virginianus	Wild	North America	United States	California					7	ASOT06	Leucocytozoon	4
9	BUVIR06	Leucocytozoon	Strigidae	Bubo virginianus	Wild	North America	United States						8	ASOT1	Leucocytozoon	2
9	BUVIR06	Leucocytozoon	Strigidae	Bubo virginianus	Wild	North America	United States	Pennsylvania	This study				9	ASOT2	Leucocytozoon	1
10	BUVIR10	Leucocytozoon	Strigidae	Bubo virginianus	Wild	North America	United States	Pennsylvania	This study/New Lineage				10	ASOT3	Leucocytozoon	1
11	STOCC16	Leucocytozoon	Strigidae	Bubo virginianus	Wild	North America	United States	California					11	ATNO1	Leucocytozoon	2
11	STOCC16	Leucocytozoon	Strigidae	Bubo virginianus	Wild	North America	United States	Pennsylvania	This study				12	BNOW04	Leucocytozoon	4
12	BUVIR07	Plasmodium	Strigidae	Bubo virginianus	Wild	North America	United States						13	BT2	Leucocytozoon	2
13	MYCAME02	Plasmodium	Strigidae	Bubo virginianus	Wild	South America	Brazil						14	BUBCAP01	Leucocytozoon	1
14	PHPAT01	Plasmodium	Strigidae	Bubo virginianus	Wild	North America	United States	California					15	BUBO01	Leucocytozoon	1
1	GLBRO01	Haemoproteus	Strigidae	Glaucidium brodiei	Wild	Asia	China						16	BUBSUM01	Leucocytozoon	1
2	GLBRO02	Haemoproteus	Strigidae	Glaucidium brodiei	Wild	Asia	China						17	BUVIR01	Leucocytozoon	1
1	GLACUC01	Haemoproteus	Strigidae	Glaucidium cuculoides	Wild	Asia	Myanmar						18	BUVIR02	Leucocytozoon	3
2	GLACUC03	Haemoproteus	Strigidae	Glaucidium cuculoides	Captivity	Asia	Thailand						19	BUVIR03	Leucocytozoon	3
3	GLACUC04	Haemoproteus	Strigidae	Glaucidium cuculoides	Captivity	Asia	Thailand						20	BUVIR04	Leucocytozoon	3
4	FANTAIL01	Plasmodium	Strigidae	Glaucidium cuculoides	Captivity	Asia	Thailand						21	BUVIR05	Leucocytozoon	1
5	GLACUC02	Plasmodium	Strigidae	Glaucidium cuculoides	Wild	Asia	Myanmar						22	BUVIR06	Leucocytozoon	4
6	GLACUC05	Plasmodium	Strigidae	Glaucidium cuculoides	Captivity	Asia	Thailand						23	BUVIR10	Leucocytozoon	1
7	GLACUC06	Plasmodium	Strigidae	Glaucidium cuculoides	Captivity	Asia	Thailand						24	CHRKLA02	Leucocytozoon	4
8	GLACUC07	Plasmodium	Strigidae	Glaucidium cuculoides	Captivity	Asia	Thailand						25	CIAE02	Leucocytozoon	6
9	GLACUC08	Plasmodium	Strigidae	Glaucidium cuculoides	Captivity	Asia	Thailand						26	FALTIN11	Leucocytozoon	1
10	MILANS06	Plasmodium	Strigidae	Glaucidium cuculoides	Captivity	Asia	Thailand						27	GLSJO02	Leucocytozoon	1
11	ORW1	Plasmodium	Strigidae	Glaucidium cuculoides	Captivity	Asia	Thailand						28	NINOX04	Leucocytozoon	1
12	TEPON02	Plasmodium	Strigidae	Glaucidium cuculoides	Captivity	Asia	Thailand						29	NINOX08	Leucocytozoon	2
1	GLSJO01	Haemoproteus	Strigidae	Glaucidium sjostedti	Wild	Africa	Cameroon						30	OTSCO01	Leucocytozoon	1
1	GLSJO01	Haemoproteus	Strigidae	Glaucidium sjostedti	Wild	Africa	Gabon						31	OTSCO02	Leucocytozoon	1
2	GLSJO02	Leucocytozoon	Strigidae	Glaucidium sjostedti	Wild	Africa	Cameroon						32	OTSCO03	Leucocytozoon	1
1	TEPON02	Plasmodium	Strigidae	Ketupa ketupa	Captivity	Asia	Thailand						33	OTSCO06	Leucocytozoon	1
1	MEGASI01	Haemoproteus	Strigidae	Megascops asio	Wild	North America	United States	New Jersey	This study/New Lineage				34	OTULEM03	Leucocytozoon	1
2	PADOM11	Plasmodium	Strigidae	Megascops asio	Wild	North America	United States	New Jersey	This study				35	OTULEM04	Leucocytozoon	2
3	WW3	Plasmodium	Strigidae	Megascops asio	Wild	North America	United States	New Jersey	This study				36	OTULEM05	Leucocytozoon	3
1	ASCLA01	Haemoproteus	Strigidae	Megascops choliba	Wild	South America	Brazil						37	OTUSCO03	Leucocytozoon	2
3	PSDIS01	Haemoproteus	Strigidae	Megascops choliba	Wild	South America	Colombia						38	OTUSCO04	Leucocytozoon	1
3	ARDALB01	Plasmodium	Strigidae	Megascops choliba	Wild	South America	Uruguay						39	OTUSCO05	Leucocytozoon	1
1	OTUING01	Haemoproteus	Strigidae	Megascops ingens	Wild	South America	Peru						40	OTUSCO06	Leucocytozoon	2
1	BNOW04	Leucocytozoon	Strigidae	Megascops kennicottii	Wild	North America	United States	California					41	OTUSCO07	Leucocytozoon	1
2	STVAR05	Leucocytozoon	Strigidae	Megascops kennicottii	Wild	North America	United States	California					42	OTUSCO08	Leucocytozoon	1
3	SEIAUR01	Plasmodium	Strigidae	Megascops kennicottii	Wild	North America	United States	California					43	OTUSCO09	Leucocytozoon	1
1	NINOX01	Haemoproteus	Strigidae	Ninox philippensis	Wild	Asia	Philippines						44	PHARUB01	Leucocytozoon	1
2	NINOX02	Haemoproteus	Strigidae	Ninox philippensis	Wild	Asia	Philippines						45	STAL1	Leucocytozoon	1
3	NINOX03	Haemoproteus	Strigidae	Ninox philippensis	Wild	Asia	Philippines						46	STAL5	Leucocytozoon	2
4	NIPHI01	Haemoproteus	Strigidae	Ninox philippensis	Wild	Asia	Philippines						47	STOCC03	Leucocytozoon	5
5	NIPHI02	Haemoproteus	Strigidae	Ninox philippensis	Wild	Asia	Philippines						48	STOCC04	Leucocytozoon	1
6	NINOX04	Leucocytozoon	Strigidae	Ninox philippensis	Wild	Asia	Philippines						49	STOCC05	Leucocytozoon	1
7	NINOX05	Plasmodium	Strigidae	Ninox philippensis	Wild	Asia	Philippines						50	STOCC06	Leucocytozoon	7
1	BUBBUB02	Haemoproteus	Strigidae	Ninox scutulata	Wild	Asia	China						51	STOCC07	Leucocytozoon	1
2	FALAMU02	Haemoproteus	Strigidae	Ninox scutulata	Wild	Asia	China						52	STOCC08	Leucocytozoon	1
3	LK03	Haemoproteus	Strigidae	Ninox scutulata	Wild	Asia	China						53	STOCC09	Leucocytozoon	1
4	NINOX06	Haemoproteus	Strigidae	Ninox scutulata	Captivity	Asia	Japan						54	STOCC10	Leucocytozoon	1
5	NINOX07	Haemoproteus	Strigidae	Ninox scutulata	Captivity	Asia	Japan						55	STOCC11	Leucocytozoon	1
5	NINOX07	Haemoproteus	Strigidae	Ninox scutulata	Captivity	Asia	Thailand						56	STOCC12	Leucocytozoon	1
5	NINOX07	Haemoproteus	Strigidae	Ninox scutulata	Wild	Asia	China						57	STOCC13	Leucocytozoon	2
6	CIAE02	Leucocytozoon	Strigidae	Ninox scutulata	Captivity	Asia	Japan						58	STOCC14	Leucocytozoon	2
7	NINOX08	Leucocytozoon	Strigidae	Ninox scutulata	Captivity	Asia	Japan						59	STOCC15	Leucocytozoon	1
7	NINOX08	Leucocytozoon	Strigidae	Ninox scutulata	Wild	Asia	Thailand						60	STOCC16	Leucocytozoon	3
8	NISCU1	Plasmodium	Strigidae	Ninox scutulata	Wild	Asia	Singapore						61	STRVAR01	Leucocytozoon	1
9	NISCU2	Plasmodium	Strigidae	Ninox scutulata	Captivity	Asia	Thailand						62	STVAR05	Leucocytozoon	3
10	ORW1	Plasmodium	Strigidae	Ninox scutulata	Wild	Asia	Japan						63	SURULU01	Leucocytozoon	1
1	ORW1	Plasmodium	Strigidae	Otus bakkamoena	Wild	Asia	China						1	ACCBAD01	Plasmodium	3
1	OTULEM01	Haemoproteus	Strigidae	Otus lempiji	Captivity	Asia	Japan						2	AEFUN01	Plasmodium	1
2	OTULEM02	Haemoproteus	Strigidae	Otus lempiji	Captivity	Asia	Japan						3	ALARV04	Plasmodium	1
3	OTULEM03	Leucocytozoon	Strigidae	Otus lempiji	Captivity	Asia	Japan						4	ARDALB01	Plasmodium	1
4	OTULEM04	Leucocytozoon	Strigidae	Otus lempiji	Captivity	Asia	Japan						5	ASOT05	Plasmodium	1
5	OTULEM05	Leucocytozoon	Strigidae	Otus lempiji	Captivity	Asia	Japan						6	ASSTY01	Plasmodium	2
1	OTULET01	Haemoproteus	Strigidae	Otus lettia	Captivity	Asia	Thailand						7	BAEBIC02	Plasmodium	1
2	OTULET02	Haemoproteus	Strigidae	Otus lettia	Captivity	Asia	Thailand						8	BT7	Plasmodium	1
3	TYTAL4	Haemoproteus	Strigidae	Otus lettia	Captivity	Asia	Thailand						9	BUBBUB03	Plasmodium	1
4	TYTAL6	Haemoproteus	Strigidae	Otus lettia	Captivity	Asia	Thailand						10	BUBSCA01	Plasmodium	1
5	OTULET03	Plasmodium	Strigidae	Otus lettia	Captivity	Asia	Thailand						11	BUVIR07	Plasmodium	1
1	OTUMEG01	Haemoproteus	Strigidae	Otus megalotis	Wild	Asia	Philippines						12	DENFUL02	Plasmodium	1
1	LK03	Haemoproteus	Strigidae	Otus scops	Wild	Asia	China						13	CATUST05	Plasmodium	1
2	OTSCO05	Haemoproteus	Strigidae	Otus scops	Wild	Europe	Bulgaria						14	DENFUL02	Plasmodium	1
3	OTUSCO01	Haemoproteus	Strigidae	Otus scops	Wild	Asia	China						15	EMSPO06	Plasmodium	1
4	OTUSCO02	Haemoproteus	Strigidae	Otus scops	Wild	Asia	China						16	FANTAIL01	Plasmodium	1
5	TYTAL4	Haemoproteus	Strigidae	Otus scops	Wild	Asia	China						17	GEOTRI09	Plasmodium	1
6	CIAE02	Leucocytozoon	Strigidae	Otus scops	Wild	Asia	China						18	GLACUC02	Plasmodium	2
7	FALTIN11	Leucocytozoon	Strigidae	Otus scops	Wild	Asia	China						19	GLACUC05	Plasmodium	1
8	OTSCO01	Leucocytozoon	Strigidae	Otus scops	Wild	Asia	Kazakhstan						20	GLACUC06	Plasmodium	1
9	OTSCO02	Leucocytozoon	Strigidae	Otus scops	Wild	Asia	Japan						21	GLACUC07	Plasmodium	1
10	OTSCO03	Leucocytozoon	Strigidae	Otus scops	Wild	Africa	Morocco						22	GLACUC08	Plasmodium	1
11	OTSCO06	Leucocytozoon	Strigidae	Otus scops	Wild	Africa	Morocco						23	GRW06	Plasmodium	2
12	OTUSCO03	Leucocytozoon	Strigidae	Otus scops	Wild	Asia	China						24	GRW11	Plasmodium	2
13	OTUSCO04	Leucocytozoon	Strigidae	Otus scops	Wild	Asia	China						25	LAIRI01	Plasmodium	1
14	OTUSCO05	Leucocytozoon	Strigidae	Otus scops	Wild	Asia	China						26	LINN1	Plasmodium	2
15	OTUSCO06	Leucocytozoon	Strigidae	Otus scops	Wild	Asia	China						27	MILANS06	Plasmodium	1
16	OTUSCO07	Leucocytozoon	Strigidae	Otus scops	Wild	Asia	China						28	MYCAME02	Plasmodium	4
17	OTUSCO08	Leucocytozoon	Strigidae	Otus scops	Wild	Asia	China						29	NINOX05	Plasmodium	1
18	OTUSCO09	Leucocytozoon	Strigidae	Otus scops	Wild	Asia	China						30	NISCU1	Plasmodium	1
19	EMSPO06	Plasmodium	Strigidae	Otus scops	Wild	Asia	China						31	NISCU2	Plasmodium	1
20	ORW1	Plasmodium	Strigidae	Otus scops	Wild	Asia	China						32	ORW1	Plasmodium	4
21	OTUSCO10	Plasmodium	Strigidae	Otus scops	Wild	Asia	China						33	OTULET03	Plasmodium	1
22	SW2	Plasmodium	Strigidae	Otus scops	Wild	Asia	China						34	OTUSCO10	Plasmodium	1
1	OTUSUN01	Haemoproteus	Strigidae	Otus sunia	Wild	Asia	Myanmar						35	PADOM02	Plasmodium	1
2	OTUSCO03	Leucocytozoon	Strigidae	Otus sunia	Wild	Asia	Thailand						36	PADOM11	Plasmodium	4
3	OTUSCO06	Leucocytozoon	Strigidae	Otus sunia	Wild	Asia	Thailand						37	PHPAT01	Plasmodium	1
1	PHOBAD01	Haemoproteus	Tytonidae	Phodilus badius	Captivity	Asia	Thailand						38	RWB01	Plasmodium	2
1	ASCLA01	Haemoproteus	Strigidae	Pseudoscops clamator	Wild	South America	Brazil						39	SEIAUR01	Plasmodium	5
2	ASSTY01	Plasmodium	Strigidae	Pseudoscops clamator	Wild	South America	Brazil						40	SGS1	Plasmodium	4
3	MYCAME02	Plasmodium	Strigidae	Pseudoscops clamator	Captivity	South America	Brazil						41	STVAR04	Plasmodium	1
3	MYCAME02	Plasmodium	Strigidae	Pseudoscops clamator	Wild	South America	Brazil						42	SW2	Plasmodium	2
1	MYCAME02	Plasmodium	Strigidae	Pulsatrix koeniswaldiana	Captivity	South America	Brazil						43	SW5	Plasmodium	2
1	CULKIB01	Haemoproteus	Strigidae	Strix aluco	Captivity	Asia	Russia						44	TEPON02	Plasmodium	2
1	CULKIB01	Haemoproteus	Strigidae	Strix aluco	Wild	Europe	Austria						45	TSUB01	Plasmodium	1
1	CULKIB01	Haemoproteus	Strigidae	Strix aluco	Wild	Europe	Austria						46	TURDUS1	Plasmodium	1
1	CULKIB01	Haemoproteus	Strigidae	Strix aluco	Wild	Europe	Austria						47	TYFUR01	Plasmodium	1
1	CULKIB01	Haemoproteus	Strigidae	Strix aluco	Wild	Europe	Austria						48	WW3	Plasmodium	1
1	CULKIB01	Haemoproteus	Strigidae	Strix aluco	Wild	Europe	Austria
1	CULKIB01	Haemoproteus	Strigidae	Strix aluco	Wild	Europe	Austria
1	CULKIB01	Haemoproteus	Strigidae	Strix aluco	Wild	Europe	Lithuania
1	CULKIB01	Haemoproteus	Strigidae	Strix aluco	Wild	Europe	Lithuania
1	CULKIB01	Haemoproteus	Strigidae	Strix aluco	Wild	Europe	Lithuania
1	CULKIB01	Haemoproteus	Strigidae	Strix aluco	Wild	Europe	Lithuania
2	OTUSCO01	Haemoproteus	Strigidae	Strix aluco	Wild	Asia	China
3	OTUSCO02	Haemoproteus	Strigidae	Strix aluco	Wild	Asia	China
4	STAL2	Haemoproteus	Strigidae	Strix aluco	Wild	Europe	Germany
4	STAL2	Haemoproteus	Strigidae	Strix aluco	Wild	Europe	France
4	STAL2	Haemoproteus	Strigidae	Strix aluco	Wild	Africa	Morocco
4	STAL2	Haemoproteus	Strigidae	Strix aluco	Wild	Europe	Portugal
4	STAL2	Haemoproteus	Strigidae	Strix aluco	Wild	Europe	Austria
4	STAL2	Haemoproteus	Strigidae	Strix aluco	Wild	Europe	Austria
4	STAL2	Haemoproteus	Strigidae	Strix aluco	Wild	Europe	Austria
4	STAL2	Haemoproteus	Strigidae	Strix aluco	Wild	Europe	Austria
4	STAL2	Haemoproteus	Strigidae	Strix aluco	Wild	Europe	Austria
4	STAL2	Haemoproteus	Strigidae	Strix aluco	Wild	Europe	Austria
4	STAL2	Haemoproteus	Strigidae	Strix aluco	Wild	Europe	Lithuania
4	STAL2	Haemoproteus	Strigidae	Strix aluco	Wild	Europe	Lithuania
4	STAL2	Haemoproteus	Strigidae	Strix aluco	Wild	Europe	Lithuania
4	STAL2	Haemoproteus	Strigidae	Strix aluco	Wild	Europe	Lithuania
4	STAL2	Haemoproteus	Strigidae	Strix aluco	Wild	Europe	Lithuania
4	STAL2	Haemoproteus	Strigidae	Strix aluco	Wild	Europe	Lithuania
4	STAL2	Haemoproteus	Strigidae	Strix aluco	Wild	Europe	Lithuania
4	STAL2	Haemoproteus	Strigidae	Strix aluco	Wild	Europe	Lithuania
5	STAL4	Haemoproteus	Strigidae	Strix aluco	Wild	Asia	Turkey
6	STAL1	Leucocytozoon	Strigidae	Strix aluco	Wild	Europe	Germany
7	STAL5	Leucocytozoon	Strigidae	Strix aluco	Wild	Asia	Turkey
7	STAL5	Leucocytozoon	Strigidae	Strix aluco	Wild	Asia	Turkey
8	SW2	Plasmodium	Strigidae	Strix aluco	Wild	Europe	Germany
1	CULKIB01	Haemoproteus	Strigidae	Strix nebulosa	Captivity	Europe	France
2	STAL2	Haemoproteus	Strigidae	Strix nebulosa	Captivity	Europe	France
3	STRURA02	Haemoproteus	Strigidae	Strix nebulosa	Wild	North America	United States
4	STRURA03	Haemoproteus	Strigidae	Strix nebulosa	Captivity	Europe	France
5	BUVIR04	Leucocytozoon	Strigidae	Strix nebulosa	Wild	North America	United States
6	RWB01	Plasmodium	Strigidae	Strix nebulosa	Wild	North America	United States
7	SW5	Plasmodium	Strigidae	Strix nebulosa	Wild	North America	United States
1	STOCC01	Haemoproteus	Strigidae	Strix occidentalis	Wild	North America	United States	Oregon
1	STOCC01	Haemoproteus	Strigidae	Strix occidentalis	Wild	North America	United States	California
2	STOCC02	Haemoproteus	Strigidae	Strix occidentalis	Wild	North America	United States	California
2	STOCC02	Haemoproteus	Strigidae	Strix occidentalis	Wild	North America	United States	California
3	STVAR01	Haemoproteus	Strigidae	Strix occidentalis	Wild	North America	United States	California
3	STVAR01	Haemoproteus	Strigidae	Strix occidentalis	Wild	North America	United States	Oregon
3	STVAR01	Haemoproteus	Strigidae	Strix occidentalis	Wild	North America	United States	Washington
3	STVAR01	Haemoproteus	Strigidae	Strix occidentalis	Wild	North America	United States	California
4	BUVIR03	Leucocytozoon	Strigidae	Strix occidentalis	Wild	North America	United States	California
5	BUVIR06	Leucocytozoon	Strigidae	Strix occidentalis	Wild	North America	United States	Washington
6	STOCC03	Leucocytozoon	Strigidae	Strix occidentalis	Wild	North America	United States	Washington
6	STOCC03	Leucocytozoon	Strigidae	Strix occidentalis	Wild	North America	United States	Oregon
7	STOCC04	Leucocytozoon	Strigidae	Strix occidentalis	Wild	North America	United States	Oregon
8	STOCC05	Leucocytozoon	Strigidae	Strix occidentalis	Wild	North America	United States	California
9	STOCC06	Leucocytozoon	Strigidae	Strix occidentalis	Wild	North America	United States	Oregon
9	STOCC06	Leucocytozoon	Strigidae	Strix occidentalis	Wild	North America	United States	Washington
10	STOCC07	Leucocytozoon	Strigidae	Strix occidentalis	Wild	North America	United States	California
11	STOCC08	Leucocytozoon	Strigidae	Strix occidentalis	Wild	North America	United States	California
12	STOCC09	Leucocytozoon	Strigidae	Strix occidentalis	Wild	North America	United States	California
13	STOCC10	Leucocytozoon	Strigidae	Strix occidentalis	Wild	North America	United States	California
14	STOCC11	Leucocytozoon	Strigidae	Strix occidentalis	Wild	North America	United States	California
15	STOCC12	Leucocytozoon	Strigidae	Strix occidentalis	Wild	North America	United States	California
16	STOCC13	Leucocytozoon	Strigidae	Strix occidentalis	Wild	North America	United States	California
17	STOCC14	Leucocytozoon	Strigidae	Strix occidentalis	Wild	North America	United States	Oregon
17	STOCC14	Leucocytozoon	Strigidae	Strix occidentalis	Wild	North America	United States	Washington
18	STOCC15	Leucocytozoon	Strigidae	Strix occidentalis	Wild	North America	United States	California
19	STOCC16	Leucocytozoon	Strigidae	Strix occidentalis	Wild	North America	United States	California
20	STVAR05	Leucocytozoon	Strigidae	Strix occidentalis	Wild	North America	United States	California
1	STSEL1	Haemoproteus	Strigidae	Strix seloputo	Wild	Asia	Singapore
1	STAL2	Haemoproteus	Strigidae	Strix uralensis	Wild	Europe	Lithuania
2	ARW1	Haemoproteus	Strigidae	Strix uralensis	Wild	Europe	Austria
3	CULKIB01	Haemoproteus	Strigidae	Strix uralensis	Wild	Europe	Austria
3	CULKIB01	Haemoproteus	Strigidae	Strix uralensis	Wild	Europe	Austria
3	CULKIB01	Haemoproteus	Strigidae	Strix uralensis	Wild	Europe	Austria
3	CULKIB01	Haemoproteus	Strigidae	Strix uralensis	Wild	Europe	Austria
3	CULKIB01	Haemoproteus	Strigidae	Strix uralensis	Wild	Europe	Austria
3	CULKIB01	Haemoproteus	Strigidae	Strix uralensis	Wild	Europe	Austria
4	PLAMIN01	Haemoproteus	Strigidae	Strix uralensis	Captivity	Asia	Japan
4	PLAMIN01	Haemoproteus	Strigidae	Strix uralensis	Captivity	Asia	Japan
5	STAL2	Haemoproteus	Strigidae	Strix uralensis	Captivity	Europe	France
5	STAL2	Haemoproteus	Strigidae	Strix uralensis	Wild	Europe	Austria
5	STAL2	Haemoproteus	Strigidae	Strix uralensis	Wild	Europe	Austria
5	STAL2	Haemoproteus	Strigidae	Strix uralensis	Wild	Europe	Austria
5	STAL2	Haemoproteus	Strigidae	Strix uralensis	Wild	Europe	Austria
5	STAL2	Haemoproteus	Strigidae	Strix uralensis	Wild	Europe	Austria
5	STAL2	Haemoproteus	Strigidae	Strix uralensis	Wild	Europe	Austria
5	STAL2	Haemoproteus	Strigidae	Strix uralensis	Wild	Europe	Austria
5	STAL2	Haemoproteus	Strigidae	Strix uralensis	Wild	Europe	Austria
5	STAL2	Haemoproteus	Strigidae	Strix uralensis	Wild	Europe	Austria
5	STAL2	Haemoproteus	Strigidae	Strix uralensis	Wild	Europe	Austria
5	STAL2	Haemoproteus	Strigidae	Strix uralensis	Wild	Europe	Austria
5	STAL2	Haemoproteus	Strigidae	Strix uralensis	Wild	Europe	Austria
6	STRURA01	Haemoproteus	Strigidae	Strix uralensis	Captivity	Asia	Japan
7	STRURA02	Haemoproteus	Strigidae	Strix uralensis	Captivity	Asia	Japan
8	STRURA03	Haemoproteus	Strigidae	Strix uralensis	Wild	Europe	Austria
9	PADOM02	Plasmodium	Strigidae	Strix uralensis	Captivity	Asia	Japan
1	STOCC02	Haemoproteus	Strigidae	Strix varia	Wild	North America	United States	California
2	STVAR01	Haemoproteus	Strigidae	Strix varia	Wild	North America	United States	Florida
2	STVAR01	Haemoproteus	Strigidae	Strix varia	Wild	North America	United States	California
2	STVAR01	Haemoproteus	Strigidae	Strix varia	Wild	North America	United States	Texas
2	STVAR01	Haemoproteus	Strigidae	Strix varia	Wild	North America	United States	Minnesota
2	STVAR01	Haemoproteus	Strigidae	Strix varia	Wild	North America	United States	California
2	STVAR01	Haemoproteus	Strigidae	Strix varia	Wild	North America	Canada	British Columbia
2	STVAR01	Haemoproteus	Strigidae	Strix varia	Wild	North America	United States	Minnesota
2	STVAR01	Haemoproteus	Strigidae	Strix varia	Wild	North America	United States	Wisconsin
2	STVAR01	Haemoproteus	Strigidae	Strix varia	Wild	North America	United States	Delaware
2	STVAR01	Haemoproteus	Strigidae	Strix varia	Wild	North America	United States	Maryland
2	STVAR01	Haemoproteus	Strigidae	Strix varia	Wild	North America	United States	Pennsylvania
2	STVAR01	Haemoproteus	Strigidae	Strix varia	Wild	North America	United States	North Carolina
2	STVAR01	Haemoproteus	Strigidae	Strix varia	Wild	North America	United States	South Carolina
2	STVAR01	Haemoproteus	Strigidae	Strix varia	Wild	North America	United States	Georgia
2	STVAR01	Haemoproteus	Strigidae	Strix varia	Wild	North America	United States	Florida
2	STVAR01	Haemoproteus	Strigidae	Strix varia	Wild	North America	United States	Alabama
2	STVAR01	Haemoproteus	Strigidae	Strix varia	Wild	North America	United States	Oklahoma
2	STVAR01	Haemoproteus	Strigidae	Strix varia	Wild	North America	United States	Maryland	This study
2	STVAR01	Haemoproteus	Strigidae	Strix varia	Wild	North America	United States	Delaware	This study
3	STVAR02	Haemoproteus	Strigidae	Strix varia	Wild	North America	United States	Wisconsin
4	STVAR03	Haemoproteus	Strigidae	Strix varia	Wild	North America	United States	Minnesota
5	STVAR06	Haemoproteus	Strigidae	Strix varia	Wild	North America	United States	Minnesota
5	STVAR06	Haemoproteus	Strigidae	Strix varia	Wild	North America	United States	Maine
5	STVAR06	Haemoproteus	Strigidae	Strix varia	Wild	North America	United States	Delaware
5	STVAR06	Haemoproteus	Strigidae	Strix varia	Wild	North America	United States	North Carolina
5	STVAR06	Haemoproteus	Strigidae	Strix varia	Wild	North America	United States	South Carolina
6	STVAR07	Haemoproteus	Strigidae	Strix varia	Wild	North America	United States	Alabama
7	STVAR08	Haemoproteus	Strigidae	Strix varia	Wild	North America	United States	Alabama
8	STOCC03	Leucocytozoon	Strigidae	Strix varia	Wild	North America	United States	Oregon
9	STRVAR01	Leucocytozoon	Strigidae	Strix varia	Wild	North America	United States
10	STVAR05	Leucocytozoon	Strigidae	Strix varia	Wild	North America	United States	California
11	GRW06	Plasmodium	Strigidae	Strix varia	Wild	North America	United States	Minnesota
12	LAIRI01	Plasmodium	Strigidae	Strix varia	Wild	North America	United States	California
13	PADOM11	Plasmodium	Strigidae	Strix varia	Wild	North America	United States	Minnesota
14	RWB01	Plasmodium	Strigidae	Strix varia	Wild	North America	United States	Wisconsin
14	RWB01	Plasmodium	Strigidae	Strix varia	Wild	North America	United States
15	SEIAUR01	Plasmodium	Strigidae	Strix varia	Wild	North America	United States	Wisconsin
16	STVAR04	Plasmodium	Strigidae	Strix varia	Wild	North America	United States	Minnesota
1	STOCC01	Haemoproteus	Strigidae	Strix woodfordii	Wild	Africa	Cameroon
2	STVAR01	Haemoproteus	Strigidae	Strix woodfordii	Wild	Africa	Cameroon
3	CHRKLA02	Leucocytozoon	Strigidae	Strix woodfordii	Captivity	Africa	South Africa	Gauteng
3	CHRKLA02	Leucocytozoon	Strigidae	Strix woodfordii	Captivity	Africa	South Africa	Gauteng
1	SURULU01	Leucocytozoon	Strigidae	Surnia ulula	Wild	North America	United States
1	BNOW01	Haemoproteus	Tytonidae	Tyto alba	Wild	North America	United States	California
2	BNOW02	Haemoproteus	Tytonidae	Tyto alba	Wild	North America	United States	California
3	BNOW03	Haemoproteus	Tytonidae	Tyto alba	Wild	North America	United States	California
4	TYTAL3	Haemoproteus	Tytonidae	Tyto alba	Captivity	Asia	Thailand
5	TYTAL4	Haemoproteus	Tytonidae	Tyto alba	Captivity	Asia	Thailand
6	TYTAL5	Haemoproteus	Tytonidae	Tyto alba	Captivity	Asia	Thailand
7	TYTAL6	Haemoproteus	Tytonidae	Tyto alba	Captivity	Asia	Thailand
7	TYTAL6	Haemoproteus	Tytonidae	Tyto alba	Captivity	Africa	South Africa	Gauteng
7	TYTAL6	Haemoproteus	Tytonidae	Tyto alba	Captivity	Africa	South Africa	Gauteng
7	TYTAL6	Haemoproteus	Tytonidae	Tyto alba	Captivity	Africa	South Africa	Limpopo Province
8	TYTAL7	Haemoproteus	Tytonidae	Tyto alba	Captivity	Asia	Thailand
9	BNOW04	Leucocytozoon	Tytonidae	Tyto alba	Wild	North America	United States	California
10	CHRKLA02	Leucocytozoon	Tytonidae	Tyto alba	Captivity	South Africa	Limpopo Province
11	CIAE02	Leucocytozoon	Tytonidae	Tyto alba	Captivity	Africa	South Africa	Gauteng
12	CIAE02	Leucocytozoon	Tytonidae	Tyto alba	Captivity	Europe	Portugal
13	STOCC03	Leucocytozoon	Tytonidae	Tyto alba	Wild	North America	United States	California
14	ACCBAD01	Plasmodium	Tytonidae	Tyto alba	Captivity	Asia	Thailand
15	LINN1	Plasmodium	Tytonidae	Tyto alba	Captivity	Europe	Portugal
16	SEIAUR01	Plasmodium	Tytonidae	Tyto alba	Wild	North America	United States	California
1	TYFUR01	Plasmodium	Tytonidae	Tyto furcata	Wild	South America	Brazil

## Sheet: C_Genetic Distance
	Table S1C. Genetic distance and standard error of haemosporidian lineages.
	The number of base substitutions per site between pair of sequences are shown. Standard error estimate(s) are shown above the diagonal. Analyses were conducted using the Tajima-Nei model [1]. The rate variation among sites was modeled with a gamma distribution (shape parameter = 1). The differences in the composition bias among sequences were considered in evolutionary comparisons [2]. Codon posi…
	A)	Genetic Distance (Standar Error)
	Haemoproteus cytb lineage	1	2	3	4	5	6	7	8	9	10	11	12	13	14	15
1	H. syrnii (STAL2, EF607290)		0.00216613	0.00206982	0.00296466	0.00279798	0.00360418	0.00764308	0.00827546	0.00470284	0.00579236	0.00829796	0.00829796	0.00829796	0.00829796	0.00829796
2	Haemoproteus sp. (STAL4, JQ768232)	0.00209765		0.00290009	0.00361395	0.00360989	0.00408895	0.00736896	0.00798634	0.00506097	0.00539221	0.0085514	0.0085514	0.0085514	0.0085514	0.0085514		C)	Substitution Type
3	Haemoproteus sp. (STRURA02, LC230134)	0.00209765	0.00420661		0.00211646	0.00200137	0.00298916	0.00732643	0.00813337	0.00420311	0.00547944	0.00812753	0.00812753	0.00812753	0.00812753	0.00812753		H. syrnii (STAL2, EF607290) vs Haemoproteus sp. (STAL4, JQ768232)	1-Syn
4	Haemoproteus sp. (STVAR01, AF465589)	0.00420196	0.00632048	0.00209672		0.00293316	0.00207393	0.0076772	0.00778928	0.00366979	0.00509236	0.00773628	0.00773628	0.00773628	0.00773628	0.00773628		H. syrnii (STAL2, EF607290) vs Haemoproteus sp. (STRURA02, LC230134)	1-Syn
5	Haemoproteus sp. (STRURA03, MK330140)	0.00420661	0.00632708	0.00209767	0.00420203		0.00364564	0.00762542	0.00851292	0.0047268	0.00598383	0.00845931	0.00845931	0.00845931	0.00845931	0.00845931		H. syrnii (STAL2, EF607290) vs Haemoproteus sp. (STVAR01, AF465589)	2-Syn
6	Haemoproteus sp. (STVAR03, EU627834)	0.00632028	0.00845054	0.00420196	0.00209765	0.00632048		0.00787202	0.00814071	0.00432777	0.00540462	0.00818274	0.00818274	0.00818274	0.00818274	0.00818274		H. syrnii (STAL2, EF607290) vs Haemoproteus sp. (STRURA03, MK330140)	3-Syn
7	Haemoproteus sp. (OTSCO05, KJ451480)	0.0257752	0.0235643	0.0235643	0.0257393	0.0257781	0.0279586		0.00911366	0.00806837	0.00796585	0.0104205	0.0104205	0.0104205	0.0104205	0.0104205		H. syrnii (STAL2, EF607290) vs Haemoproteus sp. (STVAR03, EU627834)	3-Syn
8	Haemoproteus sp. (CULKIB01, KF192997)	0.0345829	0.0323332	0.0323332	0.030131	0.0345873	0.032373	0.0390357		0.00815479	0.00802271	0.00764662	0.00764662	0.00764662	0.00764662	0.00764662
9	Haemoproteus sp. (Brazil: ASICLA02)	0.0126891	0.0148455	0.0105507	0.00843009	0.0126895	0.0105628	0.0300956	0.0323369		0.0049534	0.00870024	0.00870024	0.00870024	0.00870024	0.00870024
10	Haemoproteus sp. (Brazil: MEGCHO03)	0.0170299	0.0148701	0.0148701	0.0127317	0.0170308	0.0148853	0.0257096	0.0324108	0.0127444		0.00932743	0.00932743	0.00932743	0.00932743	0.00932743
11	Haemoproteus sp. (Brazil: ATHCUN01)	0.0368032	0.0390791	0.0345482	0.0323407	0.0368078	0.0345884	0.0505401	0.027934	0.0390955	0.0437314		0	0	0	0
12	Haemoproteus sp. (Brazil: MEGCHO01)	0.0368032	0.0390791	0.0345482	0.0323407	0.0368078	0.0345884	0.0505401	0.027934	0.0390955	0.0437314	0		0	0	0
13	Haemoproteus sp. (Brazil: GLABRA02)	0.0368032	0.0390791	0.0345482	0.0323407	0.0368078	0.0345884	0.0505401	0.027934	0.0390955	0.0437314	0	0		0	0
14	Haemoproteus sp. (Brazil: PULKOE01)	0.0368032	0.0390791	0.0345482	0.0323407	0.0368078	0.0345884	0.0505401	0.027934	0.0390955	0.0437314	0	0	0		0
15	Haemoproteus sp. (Brazil: GLABRA01)	0.0368032	0.0390791	0.0345482	0.0323407	0.0368078	0.0345884	0.0505401	0.027934	0.0390955	0.0437314	0	0	0	0
	B)	Genetic Distance (Standar Error)
	Haemoproteus mt genome lineage	1	2	3
1	H. syrnii (STAL2, XXXXX)		0.00102783	0.0022079
2	Haemoproteus sp. (STVAR01, XXXXX)	0.0060905		0.00215699
3	H. syrnii (CULKIB01, XXXXX)	0.027045	0.0276032
	D)	Genetic Distance (Standar Error)
	Haemoproteus cytb gene lineage	1	2	3	4
1	Haemoproteus sp. (MEGASI01, XXXXX)		0.00215629	0.0050594	0.00695371
2	Haemoproteus sp. (STOCC02, EU627839)	0.00218572		0.00550944	0.00728019
3	Haemoproteus fuscae (CELEC01, EU810722)	0.0110721	0.0133304		0.00717891
4	Homoproteus homovelans (PICAN02, GU085195)	0.0225118	0.0248461	0.0225115
	E)	Genetic Distance (Standar Error)
	Leucocytozoon cytb gene lineage	1	2	3
1	Leucocytozoon danilewskyi (BUBO01, EU624137)		0.00359941	0.00201676
2	Leucocytozoon sp. (BUVIR06, EU627805)	0.00633334		0.00290405
3	Leucocytozoon sp. (STOCC16, EU627815)	0.00209835	0.00420939
	F)	Genetic Distance (Standar Error)
	Leucocytozoon cytb gene lineage	1	2	3	4
1	Leucocytozoon sp. (BUBSUM01, MN986960)		0.00873945	0.00657688	0.00991916
2	Leucocytozoon sp. (BUVIR02, EU627821)	0.0199396		0.00919837	0.00380283
3	Leucocytozoon sp. (STAL8, ON932293)	0.0118272	0.0240672		0.0102942
4	Leucocytozoon sp. (BUBCAP01)	0.0240672	0.00389784	0.0282431
	References:
	1. Tajima F. and Nei M. (1984). Estimation of evolutionary distance between nucleotide sequences. Molecular Biology and Evolution 1:269-285.
	2. Tamura K. and Kumar S. (2002). Evolutionary distance estimation under heterogeneous substitution pattern among lineages Molecular Biology and Evolution 19:1727-1736.
	3. Kumar S., Stecher G., and Tamura K. (2016). MEGA7: Molecular Evolutionary Genetics Analysis version 7.0 for bigger datasets.Molecular Biology and Evolution 33:1870-1874.

## Sheet: D_Owl parasite NA
	Table S1D. Haemosporidian lineages reported in owls from the Americas.
	Commun Name	Owl Species	Continent (sampled in)	Plasmodium lineages	Leucocytozoon lineages	Haemoproteus lineages
1	Northern saw-whet owl	Aegolius acadicus	North America	GEOTRI09, PADOM11	AEGACA01, STOCC06
2	Striped Owl	Asio clamator	South America	ASSTY01, MYCAME02		ASCLA01, ASICLA01
3	Long-eared Owl	Asio otus	North America		BUVIR03	ASOT03
4	Stygian Owl	Asio stygius	South America	ASSTY01
5	Burrowing Owl	Athene cunicularia	South America	DENFUL02
6	Bubo scandiacus	Bubo scandiacus	North America	BUBSCA01
7	Great Horned Owl	Bubo virginianus	North America/South America	BUVIR07, PHPAT01, MYCAME02	BNOW04, BUVIR0, BUVIR02-BUVIR06, BUVIR10, STOCC16	BUVIR08, STVAR01
8	Eastern Screech-Owl	Megascops asio	North America	PADOM11, WW3		MEGASI01
9	Tropical Screech-Owl	Megascops choliba	South America	ARDALB01		ASCLA01, PSDIS01,
10	Rufescent Screech-Owl	Megascops ingens	South America			OTUING01
11	Western Screech-Owl	Megascops kennicottii	North America	SEIAUR01	BNOW04, STVAR05
12	Tawny-browed Owl	Pulsatrix koeniswaldiana	South America	MYCAME02
13	Spotted Owl	Strix occidentalis	North America		BUVIR03, BUVIR06, STOCC03-STOCC16, STVAR05	STOCC01, STOCC02, STVAR01-STVAR03, STVAR06-STVAR08
14	Barred Owl	Strix varia	North America	GRW06, LAIRI01, PADOM11, RWB01, SEIAUR01, STVAR04	STOCC03, STVAR05	STVAR01, STVAR06, STOCC02
15	American Barn Owl	Tyto furcata	North America/South America	SEIAUR01, TYFUR01	BNOW04, STOCC03	BNOW01, BNOW02, BNOW03
			Total lineages= 60	19 lineages	24 lineages	17 lineages
	STVAR01 (16): Alabama, British Columbia, California, Delaware, Florida, Georgia, Maryland, Minnesota, North Carolina, Oklahoma, Oregon, Pennsylvania, South Carolina, Texas, Washington, Wisconsin
	North America
	South America

## Sheet: E_MalAvi Data
Table S1E. MalAvi owl parasite lineage information (Sent by Staffan Bensch on 07/05/2025).
Lineage Name	Parasite genus	Bird Order	Bird Family	Bird species	Continent	Bird status	Bird age	Bird Environment	Country	Country region	Site	Site Coordinates	Number found	Number tested	Reference	Comment	Alternative Name
AEFUN03	Haemoproteus	Strigiformes	Strigidae	Aegolius funereus	Europe	Resident	Adult	Wild	Czech Republic		Fláje Dam	50°40.00000', 013°35.00000'	1	57	Synek et al 2016
ASCLA01	Haemoproteus	Strigiformes	Strigidae	Pseudoscops clamator	South America	Resident	Adult	Wild	Brazil	Rio Grande do Sul	Porto Alegre	-29°59.62400', -051°09.51700'	1	11	Morel et al 2021	Samples collected at the time when injured birds were admitted to a Wildlife Rehabilitation Center
ASCLA01	Haemoproteus	Strigiformes	Strigidae	Megascops choliba	South America	Resident	Adult	Wild	Brazil	Rio Grande do Sul	Porto Alegre	-29°59.62400', -051°09.51700'	1	13	Morel et al 2021	Samples collected at the time when injured birds were admitted to a Wildlife Rehabilitation Center
ASICLA01	Haemoproteus	Strigiformes	Strigidae	Pseudoscops clamator	South America	Resident	Unknown	Wild	Colombia		Ocarros Biopark	04°10.80000', -073°36.60000'	4	4	Lotta-Arevalo et al 2023
ASIFLA02	Haemoproteus	Strigiformes	Strigidae	Asio flammeus	Asia	Migratory	Unknown	Wild	China		Changping District_F	40°09.14000', 116°19.29000'	1		Huang et al 2020
ASIOTU01	Haemoproteus	Strigiformes	Strigidae	Asio otus	Asia	Migratory	Unknown	Wild	China		Fengtai District_A	39°47.58000', 116°24.34000'	1		Huang et al 2020
ASOT03	Haemoproteus	Strigiformes	Strigidae	Asio otus	North America			Wild	United States	California					Ishak et al 2008
ASOT03	Haemoproteus	Strigiformes	Strigidae	Asio otus	Europe			Wild	Lithuania						Ishak et al 2008
ASOT04	Haemoproteus	Strigiformes	Strigidae	Asio otus	Europe			Wild	Lithuania						Ishak et al 2008
ATHBRA01	Haemoproteus	Strigiformes	Strigidae	Athene brama	Asia	Resident	Adult + Juvenile	Captivity	Thailand		Kasetsart University	14°01.00000', 099°58.00000'	4	27	Pornpanom et al 2019	wild birds sampled at a raptor rehabilitation unit
ATNO2	Haemoproteus	Strigiformes	Strigidae	Athene noctua	Africa	Resident	Adult	Wild	Morocco				1	1	Mata et al 2015		H146
BNOW01	Haemoproteus	Strigiformes	Tytonidae	Tyto alba	North America			Wild	United States	California					Ishak et al 2008
BNOW02	Haemoproteus	Strigiformes	Tytonidae	Tyto alba	North America			Wild	United States	California					Ishak et al 2008
BNOW03	Haemoproteus	Strigiformes	Tytonidae	Tyto alba	North America			Wild	United States	California					Ishak et al 2008
BUBBUB01	Haemoproteus	Strigiformes	Strigidae	Bubo bubo	Asia	Resident	Unknown	Wild	China		Daxing District_C	39°44.56000', 116°20.49000'	1		Huang et al 2020
BUBBUB02	Haemoproteus	Strigiformes	Strigidae	Ninox scutulata	Asia	Resident	Unknown	Wild	China		Fengtai District_C	39°48.52000', 116°24.06000'	1		Huang et al 2020
BUBBUB02	Haemoproteus	Strigiformes	Strigidae	Bubo bubo	Asia	Resident	Unknown	Wild	China		Daxing District_C	39°44.56000', 116°20.49000'	2		Huang et al 2020
BUBBUB02	Haemoproteus	Strigiformes	Strigidae	Athene noctua	Asia	Resident	Unknown	Wild	China		Tongzhou District_A	39°43.23000', 116°43.01000'	1		Huang et al 2020
BUBIBI01	Haemoproteus	Strigiformes	Strigidae	Bubo bubo	Asia	Resident	Unknown	Wild	China		Mentougou District	40°00.21000', 116°05.00000'	3		Huang et al 2020
BUBIBI01	Haemoproteus	Strigiformes	Strigidae	Asio otus	Asia	Migratory	Unknown	Wild	China		Fangshan District_H	39°36.14000', 116°02.17000'	2		Huang et al 2020
BUBIBI01	Haemoproteus	Strigiformes	Strigidae	Athene noctua	Asia	Resident	Unknown	Wild	China		Haidian District_L	39°58.11000', 116°22.08000'	1		Huang et al 2020
BUBIBI01	Haemoproteus	Strigiformes	Strigidae	Asio flammeus	Asia	Migratory	Unknown	Wild	China		Changping District_F	40°09.14000', 116°19.29000'	1		Huang et al 2020
BUVIR08	Haemoproteus	Strigiformes	Strigidae	Bubo virginianus	North America			Wild	United States						Outlaw & Ricklefs 2009		STRI15
CIRCUM01	Haemoproteus	Strigiformes	Strigidae	Asio otus	Asia	Migratory	Adult	Wild	Russia	Kaliningradskaya Oblast'	Curonian Spit	55°05.00000', 020°44.00000'	1		Bukauskaite et al 2015		CIRCUM01
CIRCUM01	Haemoproteus	Strigiformes	Strigidae	Asio otus	Asia	Migratory	Unknown	Wild	China		Fangshan District_F	39°33.15000', 115°48.47000'	3		Huang et al 2020
CIRCUM01	Haemoproteus	Strigiformes	Strigidae	Athene noctua	Asia	Resident	Unknown	Wild	China		Haidian District_K	39°57.11000', 116°15.50000'	1		Huang et al 2020
CULKIB01	Haemoproteus	Strigiformes	Strigidae	Strix aluco	Asia	Resident	Adult	Captivity	Russia	Kaliningradskaya Oblast'	Curonian Spit	55°05.00000', 020°44.00000'	1		Bukauskaite et al 2015	From Kaliningrad Zoo	CULCIB01
CULKIB01	Haemoproteus	Strigiformes	Strigidae	Strix nebulosa	Europe	Resident	Unknown	Captivity	France						Giorgiadis et al 2020		Haplotype B
CULKIB01	Haemoproteus	Strigiformes	Strigidae	Bubo bubo	Europe	Resident	Unknown	Captivity	France						Giorgiadis et al 2020		Haplotype B
FALAMU01	Haemoproteus	Strigiformes	Strigidae	Athene noctua	Asia	Resident	Unknown	Wild	China		Haidian District_L	39°58.11000', 116°22.08000'	1		Huang et al 2020
FALAMU02	Haemoproteus	Strigiformes	Strigidae	Ninox scutulata	Asia	Resident	Unknown	Wild	China		Xicheng District_E	39°56.19000', 116°22.57000'	1		Huang et al 2020
GLACUC01	Haemoproteus	Strigiformes	Strigidae	Athene brama	Asia			Wild	Myanmar						Ishtiaq et al 2007		H-LIN11
GLACUC01	Haemoproteus	Strigiformes	Strigidae	Glaucidium cuculoides	Asia			Wild	Myanmar						Ishtiaq et al 2007		H-LIN11
GLACUC03	Haemoproteus	Strigiformes	Strigidae	Glaucidium cuculoides	Asia	Resident	Adult	Captivity	Thailand		Kasetsart University	14°01.00000', 099°58.00000'	1	27	Pornpanom et al 2019	wild birds sampled at a raptor rehabilitation unit
GLACUC04	Haemoproteus	Strigiformes	Strigidae	Glaucidium cuculoides	Asia	Resident	Juvenile	Captivity	Thailand		Kasetsart University	14°01.00000', 099°58.00000'	1	27	Pornpanom et al 2019	wild birds sampled at a raptor rehabilitation unit
GLBRO01	Haemoproteus	Strigiformes	Strigidae	Glaucidium brodiei	Asia	Unknown		Wild	China		Nanling	30°53.60000', 118°20.20000'	1		Zhang et al 2014
GLBRO02	Haemoproteus	Strigiformes	Strigidae	Glaucidium brodiei	Asia	Unknown		Wild	China		Houmiling	18°45.00000', 108°58.00000'	1		Zhang et al 2014
GLSJO01	Haemoproteus	Strigiformes	Strigidae	Glaucidium sjostedti	Africa			Wild	Cameroon						Ishak et al 2008
GLSJO01	Haemoproteus	Strigiformes	Strigidae	Glaucidium sjostedti	Africa			Wild	Gabon						Beadell et al 2009		WAH10
LK03	Haemoproteus	Strigiformes	Strigidae	Ninox scutulata	Asia	Resident	Unknown	Wild	China		Haidian District_J	39°55.36000', 116°19.08000'	1		Huang et al 2020
LK03	Haemoproteus	Strigiformes	Strigidae	Otus scops	Asia	Migratory	Unknown	Wild	China		Fangshan District_J	39°45.01000', 116°02.50000'	1		Huang et al 2020
NINOX01	Haemoproteus	Strigiformes	Strigidae	Ninox philippensis	Asia			Wild	Philippines		Panay	11°03.90000', 122°27.63600'	1		Silva-Iturriza et al 2012b		46
NINOX02	Haemoproteus	Strigiformes	Strigidae	Ninox philippensis	Asia			Wild	Philippines		Panay	11°03.90000', 122°27.63600'	1		Silva-Iturriza et al 2012b		48
NINOX03	Haemoproteus	Strigiformes	Strigidae	Ninox philippensis	Asia			Wild	Philippines		Panay	11°03.90000', 122°27.63600'	1		Silva-Iturriza et al 2012b		47
NINOX06	Haemoproteus	Strigiformes	Strigidae	Ninox scutulata	Asia	Migratory	Unknown	Captivity	Japan		Inokashira Animal Hospital	35°41.68600’, 139°34.17780'	1	3	Inumaru et al 2017	injured and rescued wild birds
NINOX07	Haemoproteus	Strigiformes	Strigidae	Ninox scutulata	Asia	Migratory	Unknown	Captivity	Japan		Inokashira Animal Hospital	35°41.68600’, 139°34.17780'	1	3	Inumaru et al 2017	injured and rescued wild birds
NINOX07	Haemoproteus	Strigiformes	Strigidae	Ninox scutulata	Asia	Resident	Adult	Captivity	Thailand		Kasetsart University	14°01.00000', 099°58.00000'	2	4	Pornpanom et al 2019	wild birds sampled at a raptor rehabilitation unit
NINOX07	Haemoproteus	Strigiformes	Strigidae	Ninox scutulata	Asia	Resident	Unknown	Wild	China		Xicheng District_C	39°53.05000', 116°22.51000'	2		Huang et al 2020
NIPHI01	Haemoproteus	Strigiformes	Strigidae	Ninox philippensis	Asia			Wild	Philippines		Negros	10°50.21900', 123°27.24300'	1		Silva-Iturriza et al 2012b		45
NIPHI02	Haemoproteus	Strigiformes	Strigidae	Ninox philippensis	Asia			Wild	Philippines		Negros	10°50.21900', 123°27.24300'	1		Silva-Iturriza et al 2012b		49
OTSCO05	Haemoproteus	Strigiformes	Strigidae	Otus scops	Europe	Migratory	Adult	Wild	Bulgaria		Kalimok	44°01.00000', 026°26.00000'			Valkiunas et al 2014
OTUING01	Haemoproteus	Strigiformes	Strigidae	Megascops ingens	South America	Unknown	Unknown	Wild	Peru		Community_4	-06°06.40999', -078°20.49499'	1	4	McNew et al 2021	Precise locality information as well as age/sex for individual hosts is available in supplemental datasets for McNew et al. 2021
OTULEM01	Haemoproteus	Strigiformes	Strigidae	Otus lempiji	Asia	Resident	Unknown	Captivity	Japan		Bird Clinic Kanesaka Animal Hospital	35°32.65860’, 140°12.84750’	1	1	Inumaru et al 2017	injured and rescued wild birds
OTULEM02	Haemoproteus	Strigiformes	Strigidae	Otus lempiji	Asia	Resident	Unknown	Captivity	Japan		Kanagawa Prefecture Natural Conservation Center	35°26.50400’, 139°17.66400’	1	2	Inumaru et al 2017	injured and rescued wild birds
OTULET01	Haemoproteus	Strigiformes	Strigidae	Otus lettia	Asia	Resident	Adult	Captivity	Thailand		Kasetsart University	14°01.00000', 099°58.00000'	1	37	Pornpanom et al 2019	wild birds sampled at a raptor rehabilitation unit
OTULET02	Haemoproteus	Strigiformes	Strigidae	Otus lettia	Asia	Resident	Adult	Captivity	Thailand		Kasetsart University	14°01.00000', 099°58.00000'	1	37	Pornpanom et al 2019	wild birds sampled at a raptor rehabilitation unit
OTUMEG01	Haemoproteus	Strigiformes	Strigidae	Otus megalotis	Asia			Wild	Philippines		Panay	11°03.90000', 122°27.63600'	1		Silva-Iturriza et al 2012b		50
OTUSCO01	Haemoproteus	Strigiformes	Strigidae	Bubo bubo	Asia	Resident	Unknown	Wild	China		Fengtai District_B	39°48.14000', 116°11.56000'	1		Huang et al 2020
OTUSCO01	Haemoproteus	Strigiformes	Strigidae	Otus scops	Asia	Migratory	Unknown	Wild	China		Haidian District_O	40°02.59000', 116°16.28000'	4		Huang et al 2020
OTUSCO01	Haemoproteus	Strigiformes	Strigidae	Strix aluco	Asia	Resident	Unknown	Wild	China		Shijingshan District_B	39°56.49000', 116°09.56000'	1		Huang et al 2020
OTUSCO02	Haemoproteus	Strigiformes	Strigidae	Otus scops	Asia	Migratory	Unknown	Wild	China		Daxing District_D	39°48.07000', 116°30.42000'	5		Huang et al 2020
OTUSCO02	Haemoproteus	Strigiformes	Strigidae	Strix aluco	Asia	Resident	Unknown	Wild	China		Shijingshan District_B	39°56.49000', 116°09.56000'	1		Huang et al 2020
OTUSUN01	Haemoproteus	Strigiformes	Strigidae	Otus sunia	Asia			Wild	Myanmar						Ishtiaq et al 2007		H-LIN10
PHOBAD01	Haemoproteus	Strigiformes	Tytonidae	Phodilus badius	Asia	Resident	Adult	Captivity	Thailand		Kasetsart University	14°01.00000', 099°58.00000'	1	1	Pornpanom et al 2019	wild birds sampled at a raptor rehabilitation unit
PLAMIN01	Haemoproteus	Strigiformes	Strigidae	Strix uralensis	Asia	Resident	Unknown	Captivity	Japan		Bird Clinic Kanesaka Animal Hospital	35°32.65860’, 140°12.84750’	3	5	Inumaru et al 2017	injured and rescued wild birds
PLAMIN01	Haemoproteus	Strigiformes	Strigidae	Strix uralensis	Asia	Resident	Unknown	Captivity	Japan		Gyotoku Wild Bird Hospital	35°40.10030’, 139°54.94480'	1	4	Inumaru et al 2017	injured and rescued wild birds
PSDIS01	Haemoproteus	Strigiformes	Strigidae	Megascops choliba	South America	Resident	Unknown	Wild	Colombia		Wild Animals Rescue and Rehabilitation Unit (URRAS)	04°38.40000', -074°04.80000'	1	1	Lotta-Arevalo et al 2023
STAL2	Haemoproteus	Strigiformes	Strigidae	Strix aluco	Europe			Wild	Germany						Krone et al 2008
STAL2	Haemoproteus	Strigiformes	Strigidae	Strix aluco	Europe			Wild	France	Languedoc-Roussillon			2		Karadjian et al 2013		154ZI
STAL2	Haemoproteus	Strigiformes	Strigidae	Strix aluco	Africa	Resident	Adult	Wild	Morocco				1	1	Mata et al 2015		H219
STAL2	Haemoproteus	Strigiformes	Strigidae	Strix aluco	Europe	Resident	Juvenile	Wild	Portugal				1	1	Mata et al 2015		H219
STAL2	Haemoproteus	Strigiformes	Strigidae	Strix nebulosa	Europe	Resident	Unknown	Captivity	France						Giorgiadis et al 2020		Haplotype A
STAL2	Haemoproteus	Strigiformes	Strigidae	Strix uralensis	Europe	Resident	Unknown	Captivity	France						Giorgiadis et al 2020		Haplotype A
STAL2	Haemoproteus	Strigiformes	Strigidae	Bubo bubo	Europe	Resident	Unknown	Captivity	France						Giorgiadis et al 2020		Haplotype A
STAL4	Haemoproteus	Strigiformes	Strigidae	Strix aluco	Asia			Wild	Turkey	Mugla					Aysul et al 2013		mugla
STOCC01	Haemoproteus	Strigiformes	Strigidae	Strix woodfordii	Africa			Wild	Cameroon						Ishak et al 2008
STOCC01	Haemoproteus	Strigiformes	Strigidae	Strix occidentalis	North America			Wild	United States	Oregon					Ishak et al 2008
STOCC01	Haemoproteus	Strigiformes	Strigidae	Strix occidentalis	North America			Wild	United States	California					Ishak et al 2008
STOCC02	Haemoproteus	Strigiformes	Strigidae	Strix occidentalis	North America			Wild	United States	California					Ishak et al 2008
STOCC02	Haemoproteus	Strigiformes	Strigidae	Strix occidentalis	North America	Resident	Unknown	Wild	United States	California			10		Lewicki et al 2015		H5
STOCC02	Haemoproteus	Strigiformes	Strigidae	Strix varia	North America	Resident	Unknown	Wild	United States	California			1		Lewicki et al 2015		H5
STRURA01	Haemoproteus	Strigiformes	Strigidae	Strix uralensis	Asia	Resident	Unknown	Captivity	Japan		Bird Clinic Kanesaka Animal Hospital	35°32.65860’, 140°12.84750’	1	5	Inumaru et al 2017	injured and rescued wild birds
STRURA02	Haemoproteus	Strigiformes	Strigidae	Strix uralensis	Asia	Resident	Unknown	Captivity	Japan		Gyotoku Wild Bird Hospital	35°40.10030’, 139°54.94480'	3	4	Inumaru et al 2017	injured and rescued wild birds
STRURA03	Haemoproteus	Strigiformes	Strigidae	Strix uralensis	Europe	Resident	Unknown	Wild	Austria	Niederosterreich			1	1	Himmel et al unpubl
STRURA03	Haemoproteus	Strigiformes	Strigidae	Bubo bubo	Europe	Resident	Unknown	Captivity	France						Giorgiadis et al 2020		Haplotype C
STRURA03	Haemoproteus	Strigiformes	Strigidae	Strix nebulosa	Europe	Resident	Unknown	Captivity	France						Giorgiadis et al 2020		Haplotype C
STRURA03	Haemoproteus	Strigiformes	Strigidae	Bubo scandiacus	Europe	Resident	Unknown	Captivity	France						Giorgiadis et al 2020		Haplotype C
STRURA03	Haemoproteus	Strigiformes	Strigidae	Bubo bubo	Europe	Resident	Juvenile	Captivity	Switzerland		Zoo Basel	47°32.93500', 007°34.94200'	3	5	Meister et al 2023
STRURA03	Haemoproteus	Strigiformes	Strigidae	Bubo bubo	Europe	Resident	Juvenile	Captivity	Switzerland		Berne Animal Park	46°56.06660', 007°26.98000'	2	2	Meister et al 2023
STRURA03	Haemoproteus	Strigiformes	Strigidae	Bubo scandiacus	Europe	Resident	Adult	Captivity	Switzerland		Zoo Basel	47°32.93500', 007°34.94200'	1	2	Meister et al 2023
STSEL1	Haemoproteus	Strigiformes	Strigidae	Strix seloputo	Asia			Wild	Singapore						Karadjian et al 2014
STVAR01	Haemoproteus	Strigiformes	Strigidae	Strix varia	North America			Wild	United States	Florida					Ricklefs & Fallon 2002		41
STVAR01	Haemoproteus	Strigiformes	Strigidae	Bubo virginianus	North America			Wild	United States	Florida					Ricklefs & Fallon 2002		41
STVAR01	Haemoproteus	Strigiformes	Strigidae	Strix woodfordii	Africa			Wild	Cameroon						Ishak et al 2008
STVAR01	Haemoproteus	Strigiformes	Strigidae	Strix occidentalis	North America			Wild	United States	California					Ishak et al 2008
STVAR01	Haemoproteus	Strigiformes	Strigidae	Strix occidentalis	North America			Wild	United States	Oregon					Ishak et al 2008
STVAR01	Haemoproteus	Strigiformes	Strigidae	Strix occidentalis	North America			Wild	United States	Washington					Ishak et al 2008
STVAR01	Haemoproteus	Strigiformes	Strigidae	Strix varia	North America			Wild	United States	California					Ishak et al 2008
STVAR01	Haemoproteus	Strigiformes	Strigidae	Strix varia	North America			Wild	United States	Texas					Ishak et al 2008
STVAR01	Haemoproteus	Strigiformes	Strigidae	Bubo virginianus	North America			Wild	United States	California					Ishak et al 2008
STVAR01	Haemoproteus	Strigiformes	Strigidae	Strix varia	North America			Wild	United States	Minnesota					Ishak et al 2008
STVAR01	Haemoproteus	Strigiformes	Strigidae	Strix varia	North America	Resident	Unknown	Wild	United States	California			15		Lewicki et al 2015		H4
STVAR01	Haemoproteus	Strigiformes	Strigidae	Strix varia	North America	Resident	Unknown	Wild	Canada	British Columbia			1		Lewicki et al 2015		H4
STVAR01	Haemoproteus	Strigiformes	Strigidae	Strix varia	North America	Resident	Unknown	Wild	United States	Minnesota					Lewicki et al 2015		H4
STVAR01	Haemoproteus	Strigiformes	Strigidae	Strix varia	North America	Resident	Unknown	Wild	United States	Wisconsin					Lewicki et al 2015		H4
STVAR01	Haemoproteus	Strigiformes	Strigidae	Strix varia	North America	Resident	Unknown	Wild	United States	Delaware			4		Lewicki et al 2015		H4
STVAR01	Haemoproteus	Strigiformes	Strigidae	Strix varia	North America	Resident	Unknown	Wild	United States	Maryland					Lewicki et al 2015		H4
STVAR01	Haemoproteus	Strigiformes	Strigidae	Strix varia	North America	Resident	Unknown	Wild	United States	Pennsylvania					Lewicki et al 2015		H4
STVAR01	Haemoproteus	Strigiformes	Strigidae	Strix varia	North America	Resident	Unknown	Wild	United States	North Carolina					Lewicki et al 2015		H4
STVAR01	Haemoproteus	Strigiformes	Strigidae	Strix varia	North America	Resident	Unknown	Wild	United States	South Carolina					Lewicki et al 2015		H4
STVAR01	Haemoproteus	Strigiformes	Strigidae	Strix varia	North America	Resident	Unknown	Wild	United States	Georgia					Lewicki et al 2015		H4
STVAR01	Haemoproteus	Strigiformes	Strigidae	Strix varia	North America	Resident	Unknown	Wild	United States	Florida			25		Lewicki et al 2015		H4
STVAR01	Haemoproteus	Strigiformes	Strigidae	Strix varia	North America	Resident	Unknown	Wild	United States	Alabama			10		Lewicki et al 2015		H4
STVAR01	Haemoproteus	Strigiformes	Strigidae	Strix varia	North America	Resident	Unknown	Wild	United States	Oklahoma			10		Lewicki et al 2015		H4
STVAR01	Haemoproteus	Strigiformes	Strigidae	Strix occidentalis	North America	Resident	Unknown	Wild	United States	California			65		Lewicki et al 2015		H4
STVAR01	Haemoproteus	Strigiformes	Strigidae	Bubo virginianus	North America	Resident	Adult	Wild	United States		Andes New York	42°12.00000', -074°52.80000'	1	1	Fecchio et al 2023b
STVAR02	Haemoproteus	Strigiformes	Strigidae	Strix varia	North America			Wild	United States	Wisconsin					Ishak et al 2008
STVAR03	Haemoproteus	Strigiformes	Strigidae	Strix varia	North America			Wild	United States	Minnesota					Ishak et al 2008
STVAR06	Haemoproteus	Strigiformes	Strigidae	Strix varia	North America	Resident	Unknown	Wild	United States	Minnesota			4		Lewicki et al 2015		H1
STVAR06	Haemoproteus	Strigiformes	Strigidae	Strix varia	North America	Resident	Unknown	Wild	United States	Maine			6		Lewicki et al 2015		H1
STVAR06	Haemoproteus	Strigiformes	Strigidae	Strix varia	North America	Resident	Unknown	Wild	United States	Delaware			4		Lewicki et al 2015		H1
STVAR06	Haemoproteus	Strigiformes	Strigidae	Strix varia	North America	Resident	Unknown	Wild	United States	North Carolina					Lewicki et al 2015		H1
STVAR06	Haemoproteus	Strigiformes	Strigidae	Strix varia	North America	Resident	Unknown	Wild	United States	South Carolina					Lewicki et al 2015		H1
STVAR07	Haemoproteus	Strigiformes	Strigidae	Strix varia	North America	Resident	Unknown	Wild	United States	Alabama			1		Lewicki et al 2015		H2
STVAR08	Haemoproteus	Strigiformes	Strigidae	Strix varia	North America	Resident	Unknown	Wild	United States	Alabama			1		Lewicki et al 2015		H3
TYTAL3	Haemoproteus	Strigiformes	Tytonidae	Tyto alba	Asia	Resident	Adult	Captivity	Thailand		Kasetsart University	14°01.00000', 099°58.00000'	1	63	Pornpanom et al 2019	wild birds sampled at a raptor rehabilitation unit
TYTAL4	Haemoproteus	Strigiformes	Strigidae	Otus lettia	Asia	Resident	Adult + Juvenile	Captivity	Thailand		Kasetsart University	14°01.00000', 099°58.00000'	13	37	Pornpanom et al 2019	wild birds sampled at a raptor rehabilitation unit
TYTAL4	Haemoproteus	Strigiformes	Tytonidae	Tyto alba	Asia	Resident	Adult + Juvenile	Captivity	Thailand		Kasetsart University	14°01.00000', 099°58.00000'	3	63	Pornpanom et al 2019	wild birds sampled at a raptor rehabilitation unit
TYTAL4	Haemoproteus	Strigiformes	Strigidae	Otus scops	Asia	Migratory	Unknown	Wild	China		Haidian District_O	40°02.59000', 116°16.28000'	2		Huang et al 2020
TYTAL5	Haemoproteus	Strigiformes	Tytonidae	Tyto alba	Asia	Resident	Adult	Captivity	Thailand		Kasetsart University	14°01.00000', 099°58.00000'	1	63	Pornpanom et al 2019	wild birds sampled at a raptor rehabilitation unit
TYTAL6	Haemoproteus	Strigiformes	Strigidae	Otus lettia	Asia	Resident	Adult + Juvenile	Captivity	Thailand		Kasetsart University	14°01.00000', 099°58.00000'	4	37	Pornpanom et al 2019	wild birds sampled at a raptor rehabilitation unit
TYTAL6	Haemoproteus	Strigiformes	Tytonidae	Tyto alba	Asia	Resident	Adult	Captivity	Thailand		Kasetsart University	14°01.00000', 099°58.00000'	7	63	Pornpanom et al 2019	wild birds sampled at a raptor rehabilitation unit
TYTAL6	Haemoproteus	Strigiformes	Tytonidae	Tyto alba	Africa	Unknown	Unknown	Captivity	South Africa	Gauteng					Gaorekew et al unpubl	National Zoological Gardens
TYTAL6	Haemoproteus	Strigiformes	Tytonidae	Tyto alba	Africa	Unknown	Unknown	Captivity	South Africa	Gauteng					Gaorekew et al unpubl	National Zoological Gardens
TYTAL6	Haemoproteus	Strigiformes	Tytonidae	Tyto alba	Africa	Unknown	Unknown	Captivity	South Africa	Limpopo Province					Gaorekew et al unpubl	National Zoological Gardens - MOKOPANE
TYTAL7	Haemoproteus	Strigiformes	Tytonidae	Tyto alba	Asia	Resident	Juvenile	Captivity	Thailand		Kasetsart University	14°01.00000', 099°58.00000'	1	63	Pornpanom et al 2019	wild birds sampled at a raptor rehabilitation unit
AEFUN02	Leucocytozoon	Strigiformes	Strigidae	Aegolius funereus	Europe			Wild	Lithuania						Ishak et al 2008
AEFUN02	Leucocytozoon	Strigiformes	Strigidae	Aegolius funereus	Europe	Resident	Adult	Wild	Czech Republic		Fláje Dam	50°40.00000', 013°35.00000'	39	57	Synek et al 2016
AEFUN02	Leucocytozoon	Strigiformes	Strigidae	Aegolius funereus	Europe	Resident	Juvenile	Wild	Czech Republic		Fláje Dam	50°40.00000', 013°35.00000'	45	113	Synek et al 2016
AEGACA01	Leucocytozoon	Strigiformes	Strigidae	Aegolius acadicus	North America	Migratory	Adult	Wild	United States		Chester Co. Newtown Sq. 911 Delchester Rd	39°58.80000', -075°29.40000'	2	6	Fecchio et al 2023b
ASIFLA01	Leucocytozoon	Strigiformes	Strigidae	Asio flammeus	Asia	Migratory	Unknown	Captivity	Japan		Inokashira Animal Hospital	35°41.68600’, 139°34.17780'	1	1	Inumaru et al 2017	injured and rescued wild birds
ASIFLA01	Leucocytozoon	Strigiformes	Strigidae	Asio flammeus	Asia	Migratory	Unknown	Wild	China		Changping District_F	40°09.14000', 116°19.29000'	2		Huang et al 2020
ASIFLA01	Leucocytozoon	Strigiformes	Strigidae	Asio flammeus	Asia	Resident	Unknown	Wild	Thailand		Kasetsart University	14°01.00000', 099°58.00000'	1	1	Lertwatcharasarakul et al 2021	Samples taken at Raptor rehabilitation center
ASIOTU02	Leucocytozoon	Strigiformes	Strigidae	Asio otus	Asia	Migratory	Unknown	Wild	China		Haidian District_K	39°57.11000', 116°15.50000'	1		Huang et al 2020
ASIOTU03	Leucocytozoon	Strigiformes	Strigidae	Asio otus	Asia	Migratory	Unknown	Wild	China		Shijingshan District_A	39°56.20000', 116°08.23000'	1		Huang et al 2020
ASOT06	Leucocytozoon	Strigiformes	Strigidae	Asio otus	Europe			Wild	Lithuania						Ishak et al 2008
ASOT06	Leucocytozoon	Strigiformes	Strigidae	Aegolius funereus	Europe			Wild	Lithuania						Ishak et al 2008
ASOT06	Leucocytozoon	Strigiformes	Strigidae	Asio otus	Asia	Migratory	Unknown	Wild	China		Haidian District_K	39°57.11000', 116°15.50000'	5		Huang et al 2020
ASOT06	Leucocytozoon	Strigiformes	Strigidae	Athene noctua	Asia	Resident	Unknown	Wild	China		Haidian District_K	39°57.11000', 116°15.50000'	2		Huang et al 2020
ASOT1	Leucocytozoon	Strigiformes	Strigidae	Asio otus	Europe			Wild	Germany						Krone et al 2008
ASOT1	Leucocytozoon	Strigiformes	Strigidae	Asio otus	Europe			Wild	Lithuania						Ishak et al 2008
ASOT2	Leucocytozoon	Strigiformes	Strigidae	Asio otus	Europe			Wild	Germany						Krone et al 2008
ASOT3	Leucocytozoon	Strigiformes	Strigidae	Asio otus	Europe	Migratory	Unknown	Wild	Lithuania						Pacheco et al 2017		Leucocytozoon danilewskyi clone H01.14D
ATNO1	Leucocytozoon	Strigiformes	Strigidae	Athene noctua	Africa	Resident	Adult	Wild	Morocco				1	1	Mata et al 2015		H145
ATNO1	Leucocytozoon	Strigiformes	Strigidae	Athene noctua	Europe	Resident	Adult	Wild	Portugal				2	3	Mata et al 2015		H145
BNOW04	Leucocytozoon	Strigiformes	Tytonidae	Tyto alba	North America			Wild	United States	California					Ishak et al 2008
BNOW04	Leucocytozoon	Strigiformes	Strigidae	Bubo virginianus	North America			Wild	United States	California					Ishak et al 2008
BNOW04	Leucocytozoon	Strigiformes	Strigidae	Megascops kennicottii	North America			Wild	United States	California					Ishak et al 2008
BT2	Leucocytozoon	Strigiformes	Strigidae	Aegolius funereus	Europe	Resident	Adult	Wild	Czech Republic		Fláje Dam	50°40.00000', 013°35.00000'	2	57	Synek et al 2016
BT2	Leucocytozoon	Strigiformes	Strigidae	Aegolius funereus	Europe	Resident	Juvenile	Wild	Czech Republic		Fláje Dam	50°40.00000', 013°35.00000'	5	113	Synek et al 2016
BUBCAP01	Leucocytozoon	Strigiformes	Strigidae	Bubo capensis	Africa	Unknown	Unknown	Captivity	South Africa	Gauteng					Gaorekew et al unpubl	National Zoological Gardens
BUBO01	Leucocytozoon	Strigiformes	Strigidae	Bubo bubo	Europe			Wild	Spain						Ortego & Cordero 2009		EO1
BUBSUM01	Leucocytozoon	Strigiformes	Strigidae	Bubo sumatranus	Asia	Resident	Unknown	Wild	Thailand		Kasetsart University	14°01.00000', 099°58.00000'	1	2	Lertwatcharasarakul et al 2021	Samples taken at Raptor rehabilitation center
BUVIR01	Leucocytozoon	Strigiformes	Strigidae	Bubo virginianus	North America			Wild	United States	California					Ishak et al 2008
BUVIR02	Leucocytozoon	Strigiformes	Strigidae	Bubo virginianus	North America			Wild	United States	California					Ishak et al 2008
BUVIR02	Leucocytozoon	Strigiformes	Strigidae	Bubo virginianus	North America	Resident	Adult	Wild	United States		Andes, New York	42°11.90833', -074°52.81233'	1		Fecchio et al 2019d
BUVIR03	Leucocytozoon	Strigiformes	Strigidae	Bubo virginianus	North America			Wild	United States	California					Ishak et al 2008
BUVIR03	Leucocytozoon	Strigiformes	Strigidae	Asio otus	North America			Wild	United States	California					Ishak et al 2008
BUVIR03	Leucocytozoon	Strigiformes	Strigidae	Strix occidentalis	North America			Wild	United States	California					Ishak et al 2008
BUVIR04	Leucocytozoon	Strigiformes	Strigidae	Bubo virginianus	North America			Wild	United States	California					Ishak et al 2008
BUVIR05	Leucocytozoon	Strigiformes	Strigidae	Bubo virginianus	North America			Wild	United States	California					Ishak et al 2008
BUVIR06	Leucocytozoon	Strigiformes	Strigidae	Bubo virginianus	North America			Wild	United States	California					Ishak et al 2008
BUVIR06	Leucocytozoon	Strigiformes	Strigidae	Strix occidentalis	North America			Wild	United States	Washington					Ishak et al 2008
CHRKLA02	Leucocytozoon	Strigiformes	Strigidae	Strix woodfordii	Africa	Unknown	Unknown	Captivity	South Africa	Gauteng					Gaorekew et al unpubl	National Zoological Gardens
CHRKLA02	Leucocytozoon	Strigiformes	Strigidae	Strix woodfordii	Africa	Unknown	Unknown	Captivity	South Africa	Gauteng					Gaorekew et al unpubl	National Zoological Gardens
CHRKLA02	Leucocytozoon	Strigiformes	Strigidae	Strix woodfordii	Africa	Unknown	Unknown	Captivity	South Africa	Gauteng					Gaorekew et al unpubl	National Zoological Gardens
CHRKLA02	Leucocytozoon	Strigiformes	Tytonidae	Tyto alba	Africa	Unknown	Unknown	Captivity	South Africa	Limpopo Province					Gaorekew et al unpubl	National Zoological Gardens - MOKOPANE
CIAE02	Leucocytozoon	Strigiformes	Strigidae	Asio otus	Asia	Resident	Unknown	Wild	Turkey	Kayseri			1	1	Ciloglu et al 2016	Negative by microscopy
CIAE02	Leucocytozoon	Strigiformes	Strigidae	Ninox scutulata	Asia	Migratory	Unknown	Captivity	Japan		Inokashira Animal Hospital	35°41.68600’, 139°34.17780'	1	3	Inumaru et al 2017	injured and rescued wild birds
CIAE02	Leucocytozoon	Strigiformes	Strigidae	Bubo bubo	Asia	Resident	Unknown	Wild	China		Fengtai District_E	39°50.00000', 116°08.27000'	1		Huang et al 2020
CIAE02	Leucocytozoon	Strigiformes	Strigidae	Bubo capensis	Africa	Unknown	Unknown	Captivity	South Africa	Gauteng					Gaorekew et al unpubl	National Zoological Gardens
CIAE02	Leucocytozoon	Strigiformes	Tytonidae	Tyto alba	Africa	Unknown	Unknown	Captivity	South Africa	Gauteng					Gaorekew et al unpubl	National Zoological Gardens
CIAE02	Leucocytozoon	Strigiformes	Tytonidae	Tyto alba	Europe	Resident	Unknown	Captivity	Portugal		Gouveia	40°29.00000', -007°35.00000'			Gomes et al unpubl	wild birds at a wildlife rehabilitation center
FALTIN11	Leucocytozoon	Strigiformes	Strigidae	Otus scops	Asia	Migratory	Unknown	Wild	China		Haidian District_N	40°01.59000', 116°20.19000'	1		Huang et al 2020
GLSJO02	Leucocytozoon	Strigiformes	Strigidae	Glaucidium sjostedti	Africa			Wild	Cameroon						Ishak et al 2008
NINOX04	Leucocytozoon	Strigiformes	Strigidae	Ninox philippensis	Asia			Wild	Philippines		Negros	10°50.21900', 123°27.24300'	1		Silva-Iturriza et al 2012b		67
NINOX08	Leucocytozoon	Strigiformes	Strigidae	Ninox scutulata	Asia	Migratory	Unknown	Captivity	Japan		Inokashira Animal Hospital	35°41.68600’, 139°34.17780'	1	3	Inumaru et al 2017	injured and rescued wild birds
NINOX08	Leucocytozoon	Strigiformes	Strigidae	Ninox scutulata	Asia	Resident	Unknown	Wild	Thailand		Kasetsart University	14°01.00000', 099°58.00000'	1	4	Lertwatcharasarakul et al 2021	Samples taken at Raptor rehabilitation center
OTSCO01	Leucocytozoon	Strigiformes	Strigidae	Otus scops	Asia			Wild	Kazakhstan						Ishak et al 2008
OTSCO02	Leucocytozoon	Strigiformes	Strigidae	Otus scops	Asia			Wild	Japan				2		Sato et al 2007		H04
OTSCO03	Leucocytozoon	Strigiformes	Strigidae	Otus scops	Africa	Migratory	Adult	Wild	Morocco				1	2	Mata et al 2015		H192
OTSCO06	Leucocytozoon	Strigiformes	Strigidae	Otus scops	Africa	Migratory	Adult	Wild	Morocco				1	2	Mata et al 2015		H193
OTULEM03	Leucocytozoon	Strigiformes	Strigidae	Otus lempiji	Asia	Resident	Unknown	Captivity	Japan		Gyotoku Wild Bird Hospital	35°40.10030’, 139°54.94480'	2	4	Inumaru et al 2017	injured and rescued wild birds
OTULEM04	Leucocytozoon	Strigiformes	Strigidae	Otus lempiji	Asia	Resident	Unknown	Captivity	Japan		Kanagawa Prefecture Natural Conservation Center	35°26.50400’, 139°17.66400’	1	2	Inumaru et al 2017	injured and rescued wild birds
OTULEM05	Leucocytozoon	Strigiformes	Strigidae	Otus lempiji	Asia	Resident	Unknown	Captivity	Japan		Bird Clinic Kanesaka Animal Hospital	35°32.65860’, 140°12.84750’	1	1	Inumaru et al 2017	injured and rescued wild birds
OTUSCO03	Leucocytozoon	Strigiformes	Strigidae	Otus scops	Asia	Migratory	Unknown	Wild	China		Haidian District_L	39°58.11000', 116°22.08000'	1		Huang et al 2020
OTUSCO03	Leucocytozoon	Strigiformes	Strigidae	Otus sunia	Asia	Resident	Unknown	Wild	Thailand		Kasetsart University	14°01.00000', 099°58.00000'	1	2	Lertwatcharasarakul et al 2021	Samples taken at Raptor rehabilitation center
OTUSCO04	Leucocytozoon	Strigiformes	Strigidae	Otus scops	Asia	Migratory	Unknown	Wild	China		Haidian District_L	39°58.11000', 116°22.08000'	7		Huang et al 2020
OTUSCO05	Leucocytozoon	Strigiformes	Strigidae	Otus scops	Asia	Migratory	Unknown	Wild	China		Shijingshan District_C	39°57.23000', 116°07.36000'	1		Huang et al 2020
OTUSCO06	Leucocytozoon	Strigiformes	Strigidae	Otus scops	Asia	Migratory	Unknown	Wild	China		Dongcheng District_C	39°54.15000', 116°25.23000'	1		Huang et al 2020
OTUSCO06	Leucocytozoon	Strigiformes	Strigidae	Otus sunia	Asia	Resident	Unknown	Wild	Thailand		Kasetsart University	14°01.00000', 099°58.00000'	1	2	Lertwatcharasarakul et al 2021	Samples taken at Raptor rehabilitation center	OTOSUN02
OTUSCO07	Leucocytozoon	Strigiformes	Strigidae	Otus scops	Asia	Migratory	Unknown	Wild	China		Dongcheng District_C	39°54.15000', 116°25.23000'	1		Huang et al 2020
OTUSCO08	Leucocytozoon	Strigiformes	Strigidae	Otus scops	Asia	Migratory	Unknown	Wild	China		Xicheng District_D	39°55.28000', 116°22.32000'	1		Huang et al 2020
OTUSCO09	Leucocytozoon	Strigiformes	Strigidae	Otus scops	Asia	Migratory	Unknown	Wild	China		Haidian District_L	39°58.11000', 116°22.08000'	1		Huang et al 2020
STAL1	Leucocytozoon	Strigiformes	Strigidae	Strix aluco	Europe			Wild	Germany						Krone et al 2008
STAL5	Leucocytozoon	Strigiformes	Strigidae	Strix aluco	Asia			Wild	Turkey	Nevsehir					Yildirim, Ciloglu et al		AY-2013
STAL5	Leucocytozoon	Strigiformes	Strigidae	Strix aluco	Asia	Resident	Unknown	Wild	Turkey	Kayseri			1	1	Ciloglu et al 2016	Positive by microscopy
STOCC03	Leucocytozoon	Strigiformes	Strigidae	Strix occidentalis	North America			Wild	United States	Washington					Ishak et al 2008
STOCC03	Leucocytozoon	Strigiformes	Strigidae	Strix occidentalis	North America			Wild	United States	Oregon					Ishak et al 2008
STOCC03	Leucocytozoon	Strigiformes	Tytonidae	Tyto alba	North America			Wild	United States	California					Ishak et al 2008
STOCC03	Leucocytozoon	Strigiformes	Strigidae	Strix varia	North America			Wild	United States	Oregon					Ishak et al 2008
STOCC04	Leucocytozoon	Strigiformes	Strigidae	Strix occidentalis	North America			Wild	United States	Oregon					Ishak et al 2008	hybrid x Strix varia
STOCC05	Leucocytozoon	Strigiformes	Strigidae	Strix occidentalis	North America			Wild	United States	California					Ishak et al 2008
STOCC06	Leucocytozoon	Strigiformes	Strigidae	Strix occidentalis	North America			Wild	United States	Oregon					Ishak et al 2008
STOCC06	Leucocytozoon	Strigiformes	Strigidae	Strix occidentalis	North America			Wild	United States	Washington					Ishak et al 2008
STOCC06	Leucocytozoon	Strigiformes	Strigidae	Aegolius funereus	Europe			Wild	Lithuania						Ishak et al 2008
STOCC06	Leucocytozoon	Strigiformes	Strigidae	Aegolius funereus	Europe	Resident	Adult	Wild	Czech Republic		Fláje Dam	50°40.00000', 013°35.00000'	35	57	Synek et al 2016
STOCC06	Leucocytozoon	Strigiformes	Strigidae	Aegolius funereus	Europe	Resident	Juvenile	Wild	Czech Republic		Fláje Dam	50°40.00000', 013°35.00000'	32	113	Synek et al 2016
STOCC06	Leucocytozoon	Strigiformes	Strigidae	Asio otus	Asia	Migratory	Unknown	Wild	China		Changping District_B	40°04.35000', 116°20.34000'	1		Huang et al 2020
STOCC06	Leucocytozoon	Strigiformes	Strigidae	Aegolius acadicus	North America	Migratory	Adult	Wild	United States		Chester Co. Newtown Sq. 911 Delchester Rd	39°58.80000', -075°29.40000'	2	6	Fecchio et al 2023b
STOCC07	Leucocytozoon	Strigiformes	Strigidae	Strix occidentalis	North America			Wild	United States	California					Ishak et al 2008
STOCC08	Leucocytozoon	Strigiformes	Strigidae	Strix occidentalis	North America			Wild	United States	California					Ishak et al 2008
STOCC09	Leucocytozoon	Strigiformes	Strigidae	Strix occidentalis	North America			Wild	United States	California					Ishak et al 2008
STOCC10	Leucocytozoon	Strigiformes	Strigidae	Strix occidentalis	North America			Wild	United States	California					Ishak et al 2008
STOCC11	Leucocytozoon	Strigiformes	Strigidae	Strix occidentalis	North America			Wild	United States	California					Ishak et al 2008
STOCC12	Leucocytozoon	Strigiformes	Strigidae	Strix occidentalis	North America			Wild	United States	California					Ishak et al 2008
STOCC13	Leucocytozoon	Strigiformes	Strigidae	Strix occidentalis	North America			Wild	United States	California					Ishak et al 2008
STOCC14	Leucocytozoon	Strigiformes	Strigidae	Strix occidentalis	North America			Wild	United States	Oregon					Ishak et al 2008
STOCC14	Leucocytozoon	Strigiformes	Strigidae	Strix occidentalis	North America			Wild	United States	Washington					Ishak et al 2008
STOCC15	Leucocytozoon	Strigiformes	Strigidae	Strix occidentalis	North America			Wild	United States	California					Ishak et al 2008
STOCC16	Leucocytozoon	Strigiformes	Strigidae	BUVIR03	North America			Wild	United States	California					Ishak et al 2008
STOCC16	Leucocytozoon	Strigiformes	Strigidae	BUVIR03	North America			Wild	United States	California					Ishak et al 2008
STVAR05	Leucocytozoon	Strigiformes	Strigidae	Megascops kennicottii	North America			Wild	United States	California					Ishak et al 2008
STVAR05	Leucocytozoon	Strigiformes	Strigidae	Strix varia	North America			Wild	United States	California					Ishak et al 2008
STVAR05	Leucocytozoon	Strigiformes	Strigidae	Strix occidentalis	North America			Wild	United States	California					Ishak et al 2008
ACCBAD01	Plasmodium	Strigiformes	Strigidae	Athene brama	Asia	Resident	Adult	Captivity	Thailand		Kasetsart University	14°01.00000', 099°58.00000'	1	27	Pornpanom et al 2019	wild birds sampled at a raptor rehabilitation unit
ACCBAD01	Plasmodium	Strigiformes	Strigidae	Bubo sumatranus	Asia	Resident	Adult	Captivity	Thailand		Kasetsart University	14°01.00000', 099°58.00000'	1	1	Pornpanom et al 2019	wild birds sampled at a raptor rehabilitation unit
ACCBAD01	Plasmodium	Strigiformes	Tytonidae	Tyto alba	Asia	Resident	Adult + Juvenile	Captivity	Thailand		Kasetsart University	14°01.00000', 099°58.00000'	2	63	Pornpanom et al 2019	wild birds sampled at a raptor rehabilitation unit
AEFUN01	Plasmodium	Strigiformes	Strigidae	Aegolius funereus	Europe			Wild	Lithuania						Ishak et al 2008
ALARV04	Plasmodium	Strigiformes	Strigidae	Bubo bubo	Asia	Resident	Unknown	Wild	China		Changping District_E	40°08.42000', 116°08.45000'	1		Huang et al 2020
ARDALB01	Plasmodium	Strigiformes	Strigidae	Megascops choliba	South America			Wild	Uruguay						Durrant et al 2006		29
ASOT05	Plasmodium	Strigiformes	Strigidae	Asio otus	Europe			Wild	Lithuania						Ishak et al 2008
ASSTY01	Plasmodium	Strigiformes	Strigidae	Pseudoscops clamator	South America	Resident	Unknown	Wild	Brazil	Rio Grande do Sul	Porto Alegre	-29°59.62400', -051°09.51700'	1	11	Morel et al 2021	Samples collected at the time when injured birds were admitted to a Wildlife Rehabilitation Center
ASSTY01	Plasmodium	Strigiformes	Strigidae	Asio stygius	South America	Resident	Unknown	Wild	Brazil	Rio Grande do Sul	Porto Alegre	-29°59.62400', -051°09.51700'	1	1	Morel et al 2021	Samples collected at the time when injured birds were admitted to a Wildlife Rehabilitation Center
BUBBUB03	Plasmodium	Strigiformes	Strigidae	Bubo bubo	Asia	Resident	Unknown	Wild	China		Fengtai District_F	39°50.47000', 116°13.59000'	1		Huang et al 2020
BUBSCA01	Plasmodium	Strigiformes	Strigidae	Bubo scandiacus	North America	Resident	Unknown	Wild	United States						Pacheco et al 2017		Plasmodium sp. clone SOWA
BUVIR07	Plasmodium	Strigiformes	Strigidae	Bubo virginianus	North America			Wild	United States						Outlaw & Ricklefs 2009		STRI23
DENFUL02	Plasmodium	Strigiformes	Strigidae	Athene cunicularia	South America	Resident	Adult	Wild	Brazil	Rio Grande do Sul	Porto Alegre	-29°59.62400', -051°09.51700'	1	8	Morel et al 2021	Samples collected at the time when injured birds were admitted to a Wildlife Rehabilitation Center
EMSPO06	Plasmodium	Strigiformes	Strigidae	Otus scops	Asia	Migratory	Unknown	Wild	China		Dongcheng District_B	39°53.40000', 116°25.35000'	1		Huang et al 2020
FANTAIL01	Plasmodium	Strigiformes	Strigidae	Glaucidium cuculoides	Asia	Resident	Adult	Captivity	Thailand		Kasetsart University	14°01.00000', 099°58.00000'	1	27	Pornpanom et al 2019	wild birds sampled at a raptor rehabilitation unit
GEOTRI09	Plasmodium	Strigiformes	Strigidae	Aegolius acadicus	North America	Migratory	Adult	Wild	United States		Chester Co. Newtown Sq. 911 Delchester Rd	39°58.80000', -075°29.40000'	1	6	Fecchio et al 2023b
GLACUC02	Plasmodium	Strigiformes	Strigidae	Athene brama	Asia			Wild	Myanmar						Ishtiaq et al 2007		P-LIN17
GLACUC02	Plasmodium	Strigiformes	Strigidae	Glaucidium cuculoides	Asia			Wild	Myanmar						Ishtiaq et al 2007		P-LIN17
GLACUC05	Plasmodium	Strigiformes	Strigidae	Glaucidium cuculoides	Asia	Resident	Adult	Captivity	Thailand		Kasetsart University	14°01.00000', 099°58.00000'	1	27	Pornpanom et al 2019	wild birds sampled at a raptor rehabilitation unit
GLACUC06	Plasmodium	Strigiformes	Strigidae	Glaucidium cuculoides	Asia	Resident	Juvenile	Captivity	Thailand		Kasetsart University	14°01.00000', 099°58.00000'	1	27	Pornpanom et al 2019	wild birds sampled at a raptor rehabilitation unit
GLACUC07	Plasmodium	Strigiformes	Strigidae	Glaucidium cuculoides	Asia	Resident	Juvenile	Captivity	Thailand		Kasetsart University	14°01.00000', 099°58.00000'	1	27	Pornpanom et al 2019	wild birds sampled at a raptor rehabilitation unit
GLACUC08	Plasmodium	Strigiformes	Strigidae	Glaucidium cuculoides	Asia	Resident	Adult	Captivity	Thailand		Kasetsart University	14°01.00000', 099°58.00000'	1	27	Pornpanom et al 2019	wild birds sampled at a raptor rehabilitation unit
GRW06	Plasmodium	Strigiformes	Strigidae	Strix varia	North America			Wild	United States	Minnesota					Ishak et al 2008
GRW06	Plasmodium	Strigiformes	Strigidae	Bubo scandiacus	Europe	Resident	Unknown	Captivity	France						Giorgiadis et al 2020		BVCH46
GRW11	Plasmodium	Strigiformes	Strigidae	Bubo scandiacus	Europe	Resident	Unknown	Captivity	France						Giorgiadis et al 2020		ANS16,POCC66
GRW11	Plasmodium	Strigiformes	Strigidae	Athene noctua	Europe	Resident	Unknown	Captivity	France						Giorgiadis et al 2020		ANS16,POCC66
LAIRI01	Plasmodium	Strigiformes	Strigidae	Strix varia	North America			Wild	United States	California					Ishak et al 2008
LINN1	Plasmodium	Strigiformes	Strigidae	Athene noctua	Europe	Resident	Unknown	Wild	Italy				1	4	Martinez-de la Puente et al 2015	in mosquito blood meals
LINN1	Plasmodium	Strigiformes	Tytonidae	Tyto alba	Europe	Resident	Juvenile	Captivity	Portugal		Gouveia	40°29.00000', -007°35.00000'			Gomes et al unpubl	wild birds at a wildlife rehabilitation center
MILANS06	Plasmodium	Strigiformes	Strigidae	Glaucidium cuculoides	Asia	Resident	Juvenile	Captivity	Thailand		Kasetsart University	14°01.00000', 099°58.00000'	1	27	Pornpanom et al 2019	wild birds sampled at a raptor rehabilitation unit
MYCAME02	Plasmodium	Strigiformes	Strigidae	Pseudoscops clamator	South America	Resident	Unknown	Captivity	Brazil	Rio de Janeiro			3	4	Tostes et al 2017	Birds from the wild; sampled after kept at rescue center (IBAMA); time in captivity unknown
MYCAME02	Plasmodium	Strigiformes	Strigidae	Pulsatrix koeniswaldiana	South America	Resident	Unknown	Captivity	Brazil	Rio de Janeiro			1	2	Tostes et al 2017	Birds from the wild; sampled after kept at rescue center (IBAMA); time in captivity unknown
MYCAME02	Plasmodium	Strigiformes	Strigidae	Bubo virginianus	South America	Resident	Adult	Wild	Brazil	Rio Grande do Sul	Porto Alegre	-29°59.62400', -051°09.51700'	1	3	Morel et al 2021	Samples collected at the time when injured birds were admitted to a Wildlife Rehabilitation Center
MYCAME02	Plasmodium	Strigiformes	Strigidae	Pseudoscops clamator	South America	Resident	Adult	Wild	Brazil	Rio Grande do Sul	Porto Alegre	-29°59.62400', -051°09.51700'	1	11	Morel et al 2021	Samples collected at the time when injured birds were admitted to a Wildlife Rehabilitation Center
NINOX05	Plasmodium	Strigiformes	Strigidae	Ninox philippensis	Asia			Wild	Philippines		Negros	10°50.21900', 123°27.24300'	1		Silva-Iturriza et al 2012b		58
NISCU1	Plasmodium	Strigiformes	Strigidae	Ninox scutulata	Asia			Wild	Singapore						Perkins & Schall 2002
NISCU2	Plasmodium	Strigiformes	Strigidae	Ninox scutulata	Asia	Resident	Adult	Captivity	Thailand		Kasetsart University	14°01.00000', 099°58.00000'	1	4	Pornpanom et al 2019	wild birds sampled at a raptor rehabilitation unit
ORW1	Plasmodium	Strigiformes	Strigidae	Ninox scutulata	Asia	Resident	Unknown	Wild	Japan	Okinawa					Murata et al unpubl
ORW1	Plasmodium	Strigiformes	Strigidae	Otus bakkamoena	Asia	Unknown		Wild	China		Houmiling	18°45.00000', 108°58.00000'	1		Zhang et al 2014
ORW1	Plasmodium	Strigiformes	Strigidae	Glaucidium cuculoides	Asia	Resident	Juvenile	Captivity	Thailand		Kasetsart University	14°01.00000', 099°58.00000'	1	27	Pornpanom et al 2019	wild birds sampled at a raptor rehabilitation unit
ORW1	Plasmodium	Strigiformes	Strigidae	Otus scops	Asia	Migratory	Unknown	Wild	China		Haidian District_L	39°58.11000', 116°22.08000'	1		Huang et al 2020
OTULET03	Plasmodium	Strigiformes	Strigidae	Otus lettia	Asia	Resident	Adult	Captivity	Thailand		Kasetsart University	14°01.00000', 099°58.00000'	1	37	Pornpanom et al 2019	wild birds sampled at a raptor rehabilitation unit
OTUSCO10	Plasmodium	Strigiformes	Strigidae	Otus scops	Asia	Migratory	Unknown	Wild	China		Chaoyang District_H	39°55.37000', 116°30.02000'	1		Huang et al 2020
PADOM02	Plasmodium	Strigiformes	Strigidae	Strix uralensis	Asia			Captivity	Japan		Ueno Zoological Gardens Tokyo	35°43.00000', 136°46.00000'			Ejiri et al 2011a	Ueda Zoological Garden	U24
PADOM11	Plasmodium	Strigiformes	Strigidae	Aegolius acadicus	North America			Wild	United States	Vermont					Martinsen et al 2008
PADOM11	Plasmodium	Strigiformes	Strigidae	Strix varia	North America			Wild	United States	Minnesota					Ishak et al 2008		BROW06
PHPAT01	Plasmodium	Strigiformes	Strigidae	Bubo virginianus	North America			Wild	United States	California					Ishak et al 2008
RWB01	Plasmodium	Strigiformes	Strigidae	Strix varia	North America			Wild	United States	Wisconsin					Ishak et al 2008
SEIAUR01	Plasmodium	Strigiformes	Tytonidae	Tyto alba	North America			Wild	United States	California					Ishak et al 2008
SEIAUR01	Plasmodium	Strigiformes	Strigidae	Strix varia	North America			Wild	United States	Wisconsin					Ishak et al 2008
SEIAUR01	Plasmodium	Strigiformes	Strigidae	Megascops kennicottii	North America			Wild	United States	California					Ishak et al 2008
SGS1	Plasmodium	Strigiformes	Strigidae	Athene noctua	Europe	Resident	Adult	Wild	Portugal		Grada	40°18.00000', -008°28.20000'	1	3	Drovetski et al 2014		H011
SGS1	Plasmodium	Strigiformes	Strigidae	Athene noctua	Europe	Resident	Adult	Wild	Portugal				1	3	Mata et al 2015		H011,H174
SGS1	Plasmodium	Strigiformes	Strigidae	Athene noctua	Asia	Resident	Unknown	Wild	China		Chaoyang District_G	39°51.05000', 116°36.01000'	1		Huang et al 2020
SGS1	Plasmodium	Strigiformes	Strigidae	Bubo scandiacus	Europe	Resident	Unknown	Captivity	France						Giorgiadis et al 2020		ANS2,DCH63
STVAR04	Plasmodium	Strigiformes	Strigidae	Strix varia	North America			Wild	United States	Minnesota					Ishak et al 2008
SW2	Plasmodium	Strigiformes	Strigidae	Strix aluco	Europe			Wild	Germany						Krone et al 2008
SW2	Plasmodium	Strigiformes	Strigidae	Otus scops	Asia	Migratory	Unknown	Wild	China		Dongcheng District_E	39°56.50000', 116°24.54000'	1		Huang et al 2020
TEPON02	Plasmodium	Strigiformes	Strigidae	Glaucidium cuculoides	Asia	Resident	Adult	Captivity	Thailand		Kasetsart University	14°01.00000', 099°58.00000'	1	27	Pornpanom et al 2019	wild birds sampled at a raptor rehabilitation unit
TEPON02	Plasmodium	Strigiformes	Strigidae	Ketupa ketupa	Asia	Resident	Adult	Captivity	Thailand		Kasetsart University	14°01.00000', 099°58.00000'	1	2	Pornpanom et al 2019	wild birds sampled at a raptor rehabilitation unit
TSUB01	Plasmodium	Strigiformes	Strigidae	Bubo bubo	Asia	Resident	Unknown	Wild	China		Haidian District_M	40°00.00000', 116°15.15000'	1		Huang et al 2020		FALTIN13
TURDUS1	Plasmodium	Strigiformes	Strigidae	Aegolius funereus	Europe	Resident	Adult	Wild	Czech Republic		Fláje Dam	50°40.00000', 013°35.00000'	1	57	Synek et al 2016
TYFUR01	Plasmodium	Strigiformes	Tytonidae	Tyto furcata	South America	Resident	Unknown	Wild	Brazil	Rio Grande do Sul	Porto Alegre	-29°59.62400', -051°09.51700'	1	15	Morel et al 2021	Samples collected at the time when injured birds were admitted to a Wildlife Rehabilitation Center
