# Supplementary material for: Haemoproteus syrnii and other haemosporidians infecting owls from North America
Source: Research Square preprint supplement (doi:10.21203/rs.3.rs-7235426/v1), 2025-08-06

# *Haemoproteus syrnii* and other haemosporidians infecting owls from North America

M. Andreína Pacheco<sup>1,\*</sup>, Erica A. Miller<sup>2</sup>, Josef Harl<sup>3,4</sup>, Francisco C. Ferreira<sup>5</sup>, Axl S. Cepeda<sup>1</sup>, Gediminas Valkiūnas<sup>6</sup>, Scott Beckerman<sup>7</sup>, Mitchell Oswald<sup>7</sup>, Nohra E. Mateus-Pinilla<sup>8,10,11</sup>, and Ananias A. Escalante<sup>1,8,\*</sup>

## Additional Information

**Additional file 2: Figure S1. HmtG-PacBio Pipeline graph output for a Great Horned Owl *Bubo virginianus* with a haemosporidian co-infection.** VAE training history and latent space clustering: (A) VAE training performance, showing total loss and reconstruction accuracy across epochs. The bottom panels show the latent space (Z) analysis: (B) distribution of  $\mu$  and  $\sigma$ , and (C) DBSCAN clustering results. The three identified OTUs are represented by different colours: OTU1 (*Leucocytozoon* sp.: IBUVIR02), OTU2 (*Leucocytozoon* sp.: ISTOCC16 and IBUVIR06) and OTU3 (*Haemoproteus syrnii*: hSTVAR01).

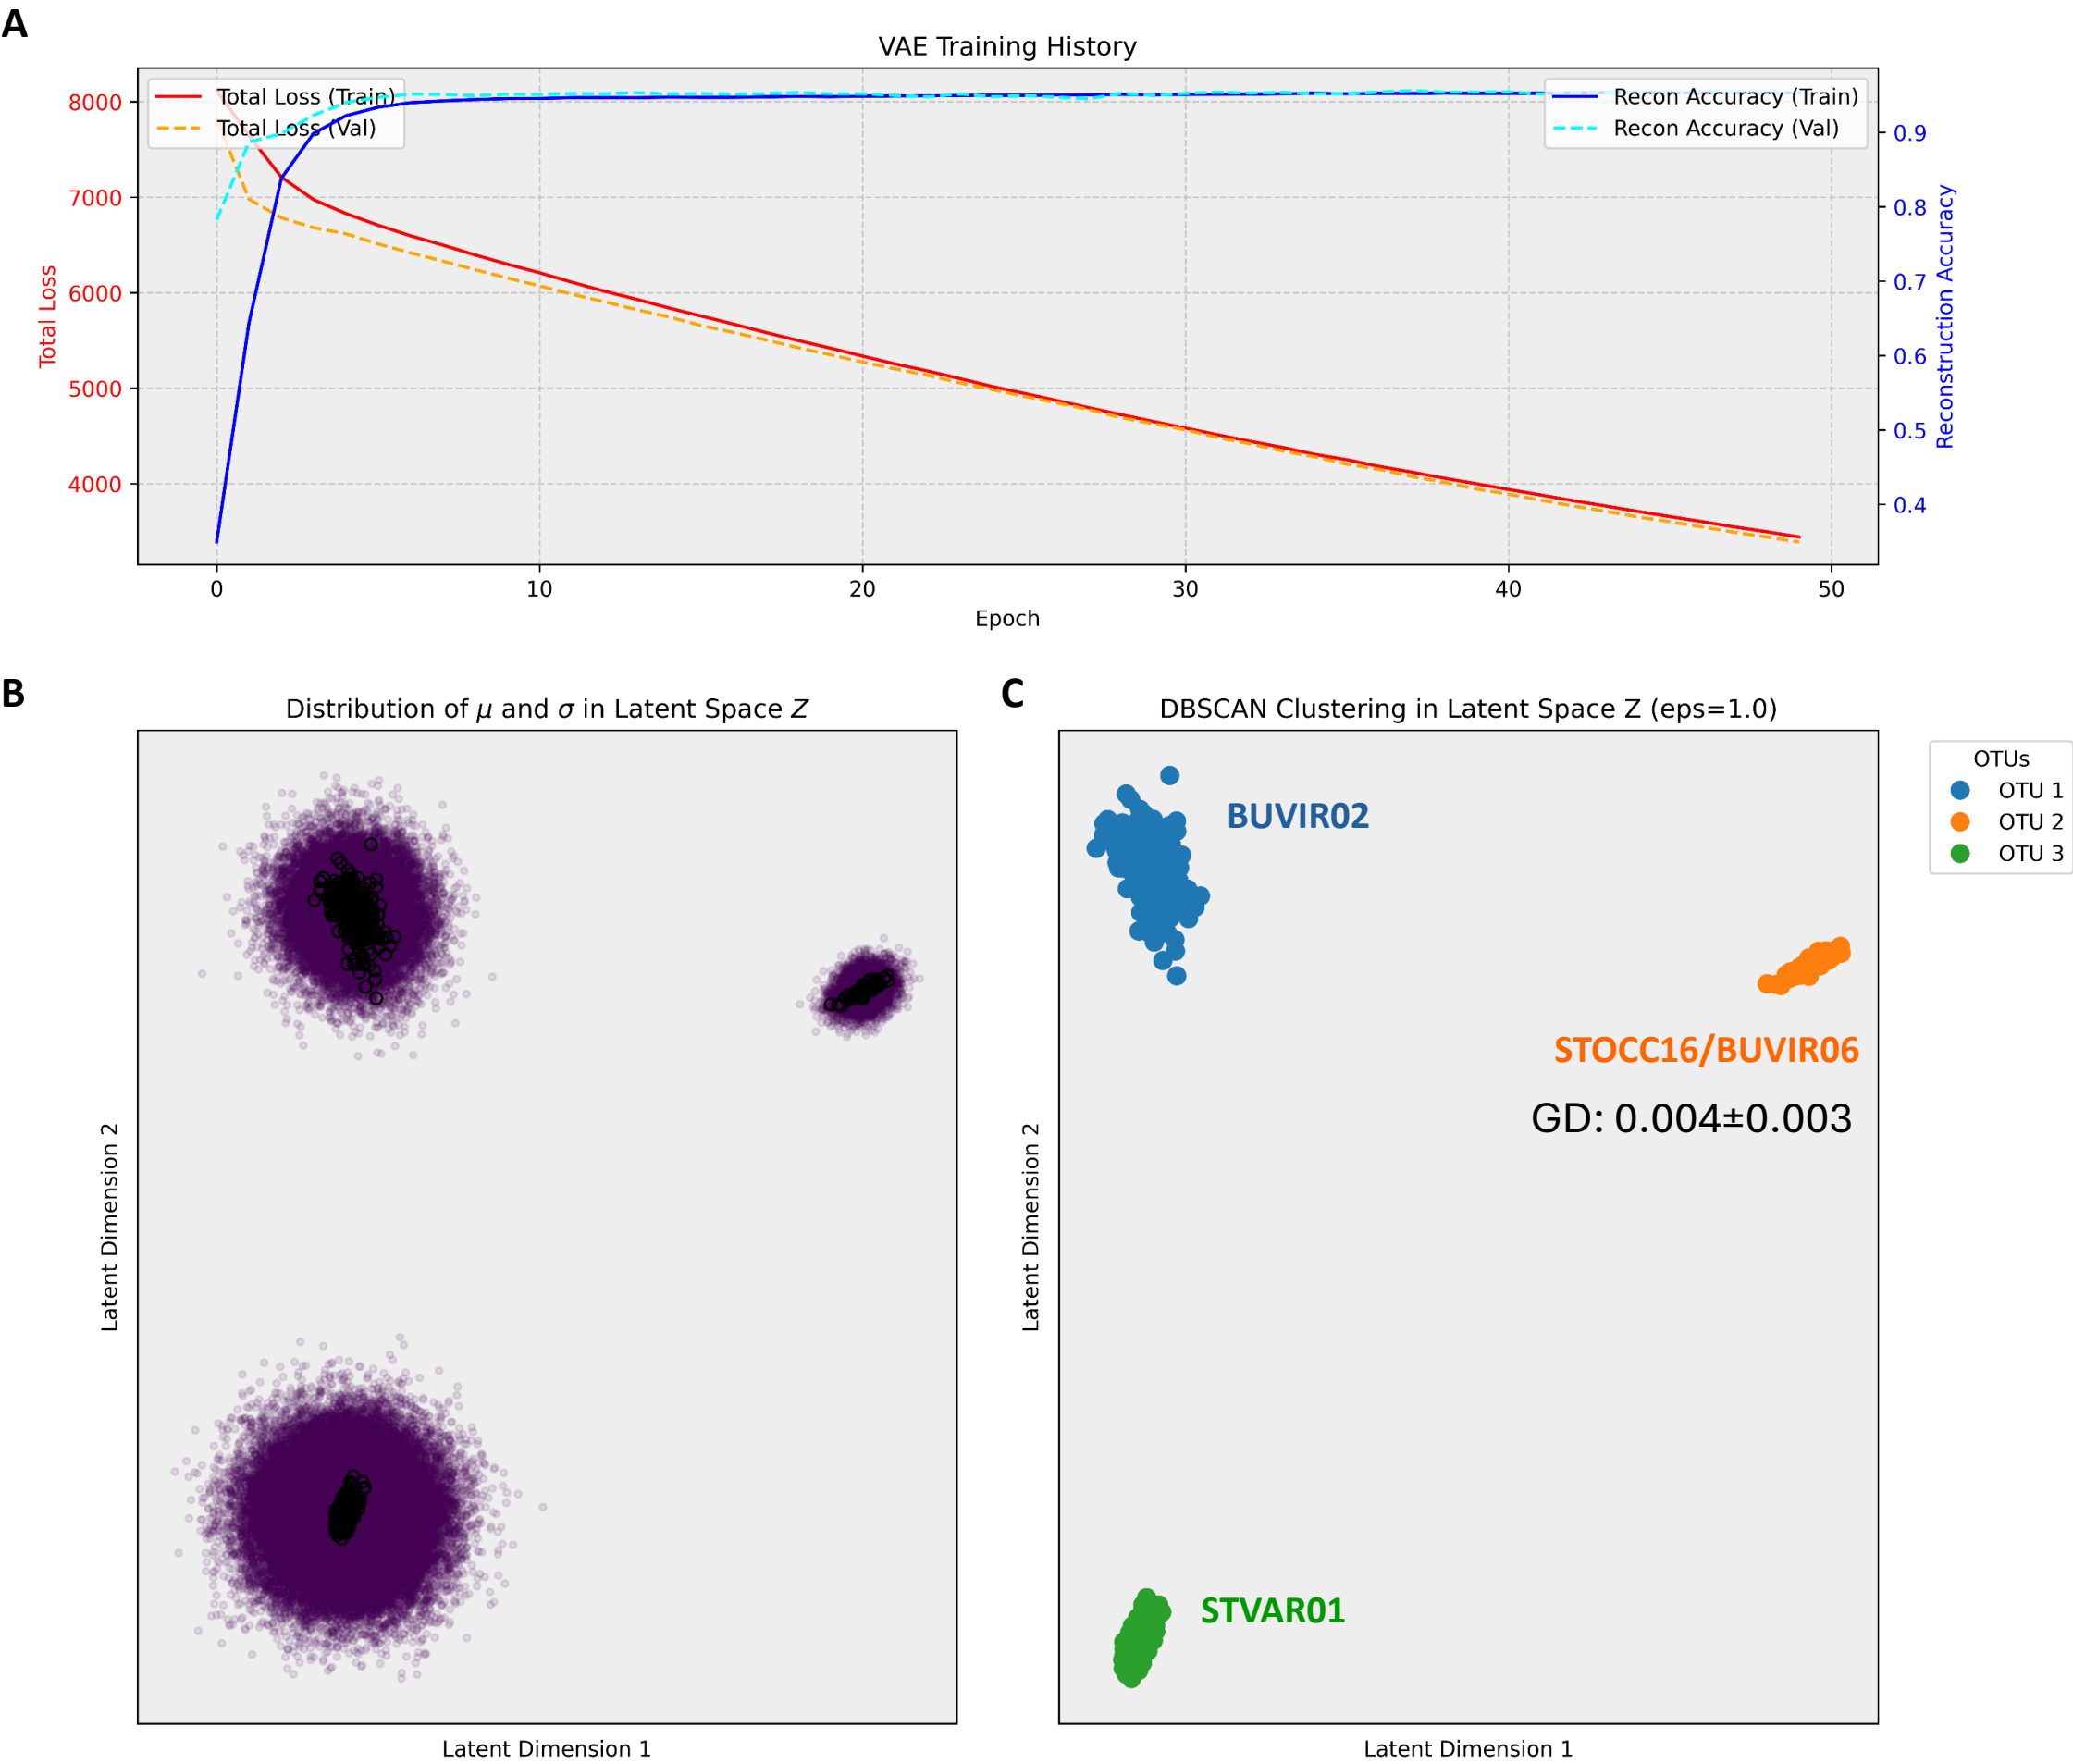

Supplement: Supplementary file 1 [file ae62b0e3ee6b957ddf9f5d45.pdf]
